# Supplementary material for: Depiction of metabolome changes in histidine-starved Escherichia coli by CE-TOFMS
Source: Royal Society of Chemistry journal article supplement (doi:10.1039/b714176a), 2007-11-15
Supplement: b714176a.pdf [file b714176a.pdf]

Supplementary Table 1. List of *E. coli* metabolites identified in the literature.

| Pathway                              | Class <sup>a</sup> | Metabolite                                                                                           | Abbreviation               | KEGG ID <sup>b</sup> | Standard chemical | Analytical mode <sup>c</sup> | Solubility  | Formula |     |    |    |    |   |    |    |    |    |           | Molecular weight | m/z <sup>d</sup>                | Description |
|--------------------------------------|--------------------|------------------------------------------------------------------------------------------------------|----------------------------|----------------------|-------------------|------------------------------|-------------|---------|-----|----|----|----|---|----|----|----|----|-----------|------------------|---------------------------------|-------------|
|                                      |                    |                                                                                                      |                            |                      |                   |                              |             | C       | H   | N  | O  | P  | S | Fe | Se | Co | Cl |           |                  |                                 |             |
| Acid fermentation                    | I                  | Acetaldehyde                                                                                         |                            | C00084               | +                 | Neutral                      | Hydrophilic | 2       | 4   | 1  |    |    |   |    |    |    |    | 44.0262   | —                | Neutral and/or hydrophobic      |             |
| Pyruvic acid oxidation               | I                  | Acetic acid                                                                                          |                            | C00033               | +                 | Anion                        | Hydrophilic | 2       | 4   | 2  |    |    |   |    |    |    |    | 60.0211   | 59.0139          | Included in the buffer solution |             |
| Short fatty acid degradation         | II                 | Acetoacetic acid                                                                                     |                            | C00164               | +                 | Anion                        | Hydrophilic | 4       | 6   | 3  |    |    |   |    |    |    |    | 102.0317  | 101.0244         | Unable to be detected in CE-MS  |             |
| Short fatty acid degradation         | II                 | Acetoacetyl-CoA                                                                                      |                            | C00332               | +                 | Nucleotide                   | Hydrophilic | 25      | 40  | 7  | 18 | 3  | 1 |    |    |    |    | 851.1363  | 850.1291         |                                 |             |
| Isoleucine biosynthesis              | I                  | 2-Aceto-2-hydroxybutyric acid                                                                        | ZAZHBA                     | —                    | —                 | Anion                        | Hydrophilic | 6       | 10  | 4  |    |    |   |    |    |    |    | 146.0579  | 145.0506         |                                 |             |
| Acetoin biosynthesis                 | I                  | Acetoin                                                                                              |                            | C00466               | +                 | Neutral                      | Hydrophilic | 4       | 8   | 2  |    |    |   |    |    |    |    | 88.0524   | —                | Neutral and/or hydrophobic      |             |
| Valine biosynthesis                  | I                  | 2-Acetylacetic acid                                                                                  | 2-Ac                       | C06010               | —                 | Anion                        | Hydrophilic | 5       | 8   | 4  |    |    |   |    |    |    |    | 132.0423  | 131.0350         |                                 |             |
| Pyruvic acid oxidation               | I                  | Acetyl-CoA                                                                                           | AcCoA                      | C00024               | +                 | Nucleotide                   | Hydrophilic | 23      | 38  | 7  | 17 | 3  | 1 |    |    |    |    | 809.1258  | 403.5556         | Detected as divalent ion in MS  |             |
| Dihydrodrolic acid analog (in vitro) | VI                 | 5-Acetyl-dihydrodrolic acid                                                                          |                            | C01136               | —                 | Cation                       | Hydrophilic | 10      | 19  | 1  | 2  |    |   |    |    |    |    | 249.0857  | 250.0930         |                                 |             |
| Peptidoglycan turnover               | II                 | N-Acetyl-D-glucosamine                                                                               | GlcNAc                     | C03000               | —                 | Neutral                      | Hydrophilic | 8       | 15  | 1  | 6  |    |   |    |    |    |    | 221.0899  | —                | Neutral and/or hydrophobic      |             |
| UDP-N-acetylglucosamine biosynthesis | I                  | N-Acetylglucosamine-1-phosphate                                                                      | GlcNAc-P                   | C04256               | +                 | Anion                        | Hydrophilic | 8       | 16  | 1  | 9  | 1  |   |    |    |    |    | 301.0563  | 300.0490         |                                 |             |
| Glucosamine degradation              | II                 | N-Acetyl-D-glucosamine-6-phosphate                                                                   | NacGlcNP                   | C00357               | +                 | Anion                        | Hydrophilic | 8       | 16  | 1  | 9  | 1  |   |    |    |    |    | 301.0563  | 300.0490         |                                 |             |
| Arginine biosynthesis                | I                  | N-Acetylglutamate semialdehyde                                                                       | N-ACGlu-semialdehyde       | C01250               | —                 | Anion                        | Hydrophilic | 7       | 11  | 1  | 4  |    |   |    |    |    |    | 173.0688  | 172.0615         |                                 |             |
| Arginine biosynthesis                | I                  | N-Acetyl-L-glutamic acid                                                                             | N-ACGlu                    | C00624               | +                 | Cation                       | Hydrophilic | 7       | 11  | 1  | 5  |    |   |    |    |    |    | 189.0637  | 190.0710         |                                 |             |
| Arginine biosynthesis                | I                  | N-Acetylglutamylyphosphate                                                                           | N-ACGlu-P                  | C04133               | —                 | Anion                        | Hydrophilic | 7       | 12  | 1  | 8  | 1  |   |    |    |    |    | 269.0301  | 268.0228         |                                 |             |
| Maltose assimilation                 | III                | Acetylmaltose                                                                                        |                            | C02130               | —                 | Neutral                      | Hydrophilic | 14      | 24  | 12 |    |    |   |    |    |    |    | 384.1268  | —                | Neutral and/or hydrophobic      |             |
| Acetylglucosamine dissimilation      | II                 | N-Acetylmannosamine                                                                                  | ManNAc                     | C00645               | +                 | Neutral                      | Hydrophilic | 8       | 15  | 1  | 6  |    |   |    |    |    |    | 221.0899  | —                | Neutral and/or hydrophobic      |             |
| Acetylglucosamine dissimilation      | II                 | N-Acetyl-D-mannosamine-6-phosphate                                                                   | ManNAc6P                   | C04257               | —                 | Anion                        | Hydrophilic | 8       | 16  | 1  | 9  | 1  |   |    |    |    |    | 301.0563  | 300.0490         |                                 |             |
| Peptidoglycan biosynthesis           | I                  | N-Acetylmuramoyl-L-alanyl-D-glutamyl-meso-2,6-diaminoheptane-D-alanyl-D-alaninediphosphoundecaprenol | MurNACAlaGluDAHeAlaAdePPUn | C05897               | —                 | Nucleotide                   | Hydrophobic | 87      | 143 | 7  | 23 | 2  |   |    |    |    |    | 1715.9711 | 1714.9638        | Out of the MS range             |             |
| Acetylglucosamine dissimilation      | II                 | N-Acetylneuraminic acid                                                                              | NeuNAc                     | C00270               | +                 | Anion                        | Hydrophilic | 11      | 19  | 1  | 9  |    |   |    |    |    |    | 309.1060  | 308.0987         |                                 |             |
| Arginine biosynthesis                | I                  | N-α-Acetylmethionine                                                                                 | N-ACOrn                    | C00437               | +                 | Cation                       | Hydrophilic | 7       | 14  | 2  | 3  |    |   |    |    |    |    | 174.1004  | 175.1077         |                                 |             |
| Pyruvic acid oxidation               | I                  | Acetylphosphate                                                                                      | Ac-P                       | —                    | —                 | Anion                        | Hydrophilic | 2       | 5   | 5  | 1  |    |   |    |    |    |    | 139.9875  | 138.9802         |                                 |             |
| Cysteine biosynthesis                | I                  | O-Acetyl-L-serine                                                                                    | AcSer                      | C00979               | +                 | Cation                       | Hydrophilic | 5       | 9   | 1  | 4  |    |   |    |    |    |    | 147.0532  | 148.0604         |                                 |             |
| Polyamine acetylation                | I                  | N <sup>1</sup> -Acetylspermidine                                                                     | N1AcSpermidine             | C00612               | —                 | Cation                       | Hydrophilic | 9       | 21  | 3  | 1  |    |   |    |    |    |    | 187.1685  | 188.1757         |                                 |             |
| Polyamine acetylation                | I                  | N <sup>1</sup> -Acetylspermine                                                                       | N1AcSpermine               | C02567               | +                 | Cation                       | Hydrophilic | 12      | 28  | 4  | 1  |    |   |    |    |    |    | 244.2263  | 245.2336         |                                 |             |
| TCA cycle                            | I                  | cis-Aconitic acid                                                                                    |                            | C00417               | +                 | Anion                        | Hydrophilic | 6       | 6   | 6  |    |    |   |    |    |    |    | 174.0164  | 173.0092         |                                 |             |
| Trans-Aconitic acid metabolism       | III                | trans-Aconitic acid                                                                                  |                            | C02341               | +                 | Anion                        | Hydrophilic | 6       | 6   | 6  |    |    |   |    |    |    |    | 174.0164  | 173.0092         |                                 |             |
| Salvage of Ade, HypXan               | I                  | Adenine                                                                                              |                            | C00147               | +                 | Cation                       | Hydrophilic | 5       | 5   |    |    |    |   |    |    |    |    | 135.0545  | 136.0618         |                                 |             |
| Purine biosynthesis                  | I                  | Adenine-5-phosphate                                                                                  | AMP                        | C00020               | +                 | Nucleotide                   | Hydrophilic | 10      | 14  | 5  | 7  | 1  |   |    |    |    |    | 347.0631  | 346.0558         |                                 |             |
| Salvage of Ade, HypXan               | I                  | Adenosine                                                                                            |                            | C00212               | +                 | Cation                       | Hydrophilic | 10      | 13  | 5  | 4  |    |   |    |    |    |    | 267.0968  | 268.1040         |                                 |             |
| Sulfuric acid assimilation           | I                  | Adenosine-3',5'-diphosphate                                                                          | pAp                        | C00054               | +                 | Nucleotide                   | Hydrophilic | 10      | 15  | 5  | 10 | 2  |   |    |    |    |    | 427.0294  | 426.0221         |                                 |             |
| Purine biosynthesis                  | I                  | Adenosine-5'-diphosphate                                                                             | ADP                        | C00008               | +                 | Nucleotide                   | Hydrophilic | 10      | 15  | 5  | 10 | 2  |   |    |    |    |    | 427.0294  | 426.0221         |                                 |             |
| ADP-ribose degradation (putative)    | VI                 | Adenosinediphosphateribose                                                                           | AdePPRI                    | C01882               | +                 | Nucleotide                   | Hydrophilic | 15      | 23  | 5  | 14 | 2  |   |    |    |    |    | 559.0717  | 558.0644         |                                 |             |
| Sulfuric acid assimilation           | I                  | Adenosine-5'-phosphosulfate                                                                          | APS                        | C00224               | +                 | Nucleotide                   | Hydrophilic | 10      | 14  | 5  | 10 | 1  | 1 |    |    |    |    | 427.0199  | 426.0126         |                                 |             |
| Purine biosynthesis                  | I                  | Adenosine-5'-triphosphate                                                                            | ATP                        | C00002               | +                 | Nucleotide                   | Hydrophilic | 10      | 16  | 5  | 13 | 3  |   |    |    |    |    | 506.9958  | 505.9885         |                                 |             |
| Cobalamin biosynthesis               | IV                 | Adenosylcobalamin-5'-phosphate                                                                       | AdeC                       | —                    | —                 | Nucleotide                   | Hydrophobic | 70      | 99  | 20 | 20 | 2  |   |    | 1  |    |    | 1658.5995 | 1657.5923        | Out of the MS range             |             |
| Cobalamin biosynthesis               | IV                 | Adenosylcobinamide                                                                                   |                            | C06508               | —                 | Cation                       | Hydrophobic | 58      | 84  | 16 | 11 |    |   |    | 1  |    |    | 1237.5681 | 1238.5754        | Out of the MS range             |             |
| Cobalamin biosynthesis               | IV                 | Adenosylcobinamide phosphate                                                                         | Adenosylcobinamide-P       | —                    | —                 | Anion                        | Hydrophobic | 58      | 83  | 16 | 14 | 1  |   |    | 1  |    |    | 1315.5188 | 1314.5115        | Out of the MS range             |             |
| Cobalamin biosynthesis               | IV                 | Adenosylcobinamide-GDP                                                                               |                            | C06510               | —                 | Nucleotide                   | Hydrophobic | 68      | 97  | 21 | 21 | 2  |   |    | 1  |    |    | 1662.5819 | 1661.5746        | Out of the MS range             |             |
| Proto- and siroheme biosynthesis     | I                  | 5-Adenosylhomocysteine                                                                               | SAHC                       | C00021               | +                 | Cation                       | Hydrophilic | 14      | 20  | 6  | 5  | 1  |   |    |    |    |    | 384.1216  | 385.1289         |                                 |             |
| Polyamine biosynthesis               | I                  | 5-Adenosylmethionine                                                                                 | dAdoMet                    | C01137               | —                 | Cation                       | Hydrophilic | 14      | 23  | 6  | 3  | 1  |   |    |    |    |    | 355.1552  | 355.1552         | Including trinary sulfur        |             |
| SAM biosynthesis                     | I                  | 5-Adenosyl-L-methionine                                                                              | SAM                        | C00019               | +                 | Cation                       | Hydrophilic | 15      | 23  | 6  | 5  | 1  |   |    |    |    |    | 399.1451  | 399.1451         | Including trinary sulfur        |             |
| Biotin biosynthesis                  | I                  | 5-Adenosyl-4-methylthio-2-oxobutanoic acid                                                           | S4MT2OBA                   | C04425               | —                 | Cation                       | Hydrophilic | 15      | 20  | 5  | 6  | 1  |   |    |    |    |    | 398.1134  | 398.1134         | Including trinary sulfur        |             |
| Purine biosynthesis                  | I                  | Adenylosuccinic acid                                                                                 | ASA                        | C03794               | +                 | Nucleotide                   | Hydrophilic | 13      | 16  | 5  | 11 | 1  |   |    |    |    |    | 449.0584  | 448.0511         |                                 |             |
| Glycogen biosynthesis                | I                  | ADP-D-glucose                                                                                        | ADP-Glc                    | C00498               | +                 | Nucleotide                   | Hydrophilic | 16      | 25  | 5  | 15 | 2  |   |    |    |    |    | 589.0822  | 588.0750         |                                 |             |
| ADP-ribose degradation (putative)    | VI                 | ADP-ribose                                                                                           |                            | C00301               | —                 | Nucleotide                   | Hydrophilic | 15      | 23  | 5  | 14 | 2  |   |    |    |    |    | 559.0717  | 558.0644         |                                 |             |
| Polyamine biosynthesis               | I                  | Agmatine                                                                                             |                            | C00179               | +                 | Cation                       | Hydrophilic | 5       | 14  | 4  |    |    |   |    |    |    |    | 130.1218  | 131.1291         |                                 |             |
| Pantothenic acid biosynthesis        | I                  | β-Alanine                                                                                            | β-Ala                      | C00099               | +                 | Cation                       | Hydrophilic | 3       | 7   | 1  | 2  |    |   |    |    |    |    | 89.0477   | 90.0550          |                                 |             |
| Peptidoglycan biosynthesis           | I                  | D-Alanine                                                                                            | D-Ala                      | C00133               | +                 | Cation                       | Hydrophilic | 3       | 7   | 1  | 2  |    |   |    |    |    |    | 89.0477   | 90.0550          |                                 |             |
| Alanine biosynthesis                 | I                  | L-Alanine                                                                                            | Ala                        | C00041               | +                 | Cation                       | Hydrophilic | 3       | 7   | 1  | 2  |    |   |    |    |    |    | 89.0477   | 90.0550          |                                 |             |
| Peptidoglycan turnover               | II                 | L-Alaninyl-γ-D-glutamyl-meso-diaminopimelyl-D-alanine                                                | AlaGluDAPAla               | —                    | —                 | Cation                       | Hydrophilic | 16      | 27  | 5  | 9  |    |   |    |    |    |    | 433.1809  | 434.1882         |                                 |             |
| Peptidoglycan biosynthesis           | I                  | D-Alanyl-D-alanine                                                                                   | AlaAla                     | C00993               | +                 | Cation                       | Hydrophilic | 6       | 12  | 2  | 3  |    |   |    |    |    |    | 160.0848  | 161.0921         |                                 |             |
| Peptidoglycan turnover               | II                 | L-Alanyl-γ-D-glutamyl-L-glutamic acid                                                                | L-Ala-D-Glu                | —                    | —                 | Cation                       | Hydrophilic | 8       | 14  | 2  | 5  |    |   |    |    |    |    | 218.0903  | 219.0975         | Multiple peaks were detected    |             |
| Peptidoglycan turnover               | II                 | L-Alanyl-γ-D-glutamyl-diaminopimelic acid                                                            | L-Ala-D-Glu-Dap            | —                    | —                 | Cation                       | Hydrophilic | 13      | 19  | 4  | 4  |    |   |    |    |    |    | 309.1437  | 310.1510         |                                 |             |
| Peptidoglycan biosynthesis           | I                  | L-Alanyl-D-glutamyl-meso-A2pm                                                                        | AlaGluA2pm                 | —                    | —                 | Cation                       | Hydrophilic | 15      | 26  | 4  | 8  |    |   |    |    |    |    | 390.1751  | 391.1823         |                                 |             |
| Allantoin degradation                | III                | Allantoic acid                                                                                       |                            | C00499               | +                 | Anion                        | Hydrophilic | 4       | 8   | 4  | 4  |    |   |    |    |    |    | 176.0546  | 175.0473         |                                 |             |
| Allantoin degradation                | III                | Allantoin                                                                                            |                            | C01551               | +                 | Anion                        | Hydrophilic | 4       | 6   | 4  | 3  |    |   |    |    |    |    | 158.0440  | 157.0367         |                                 |             |
| Lactose degradation                  | III                | Allolactose                                                                                          |                            | —                    | —                 | Neutral                      | Hydrophilic | 12      | 22  | 11 |    |    |   |    |    |    |    | 342.1162  | —                | Neutral and/or hydrophobic      |             |
| Allose degradation                   | III                | D-Allose                                                                                             |                            | C01487               | +                 | Neutral                      | Hydrophilic | 6       | 12  | 6  |    |    |   |    |    |    |    | 180.0634  | —                | Neutral and/or hydrophobic      |             |
| Allose degradation                   | III                | D-Allose-6-phosphate                                                                                 |                            | C02962               | —                 | Anion                        | Hydrophilic | 6       | 13  | 9  | 1  |    |   |    |    |    |    | 260.0297  | 259.0224         |                                 |             |
| ItaE (in vitro)                      | VI                 | L-Allothreonine                                                                                      |                            | C05519               | +                 | Cation                       | Hydrophilic | 4       | 9   | 1  | 3  |    |   |    |    |    |    | 119.0582  | 120.0655         |                                 |             |
| Allose degradation                   | III                | D-Allulose-6-phosphate                                                                               |                            | —                    | —                 | Anion                        | Hydrophilic | 6       | 13  | 9  | 1  |    |   |    |    |    |    | 260.0297  | 259.0224         |                                 |             |
| Galacturonic acid degradation        | III                | D-Altronic acid                                                                                      |                            | C00817               | —                 | Anion                        | Hydrophilic | 6       | 12  | 7  |    |    |   |    |    |    |    | 196.0583  | 195.0510         |                                 |             |
| Taurine degradation                  | III                | Aminoacetaldehyde                                                                                    |                            | C06735               | —                 | Cation                       | Hydrophilic | 2       | 5   | 1  | 1  |    |   |    |    |    |    | 59.0371   | 60.0444          |                                 |             |
| Threonine degradation                | III                | Aminoacetone                                                                                         |                            | C01888               | —                 | Cation                       | Hydrophilic | 3       | 7   | 1  | 1  |    |   |    |    |    |    | 73.0528   | 74.0600          |                                 |             |
| Tetrahydrofolic acid biosynthesis    | I                  | p-Aminobenzoylserine                                                                                 | PABA                       | C00568               | +                 | Cation                       | Hydrophilic | 7       | 7   | 1  | 2  |    |   |    |    |    |    | 137.0477  | 138.0550         |                                 |             |
| Putrescine degradation               | II                 | 4-Aminobutyraldehyde                                                                                 | 4ABA                       | C00555               | —                 | Cation                       | Hydrophilic | 4       | 9   | 1  | 1  |    |   |    |    |    |    | 87.0684   | 88.0757          |                                 |             |
| 4-Aminobutyric acid degradation      | III                | 4-Aminobutyric acid                                                                                  | 4-AB                       | C00334               | +                 | Cation                       | Hydrophilic | 4       | 9   | 1  | 2  |    |   |    |    |    |    | 103.0633  | 104.0706         |                                 |             |
| Tetrahydrofolic acid biosynthesis    | I                  | 4-Amino-4-deoxychorismic acid                                                                        | ADCA                       | C11355               | —                 | Cation                       | Hydrophilic | 10      | 11  | 5  |    | </ |   |    |    |    |    |           |                  |                                 |             |

|                                       |     |                                                                        |                      |        |   |            |             |    |    |    |    |   |   |  |    |  |  |          |          |                            |
|---------------------------------------|-----|------------------------------------------------------------------------|----------------------|--------|---|------------|-------------|----|----|----|----|---|---|--|----|--|--|----------|----------|----------------------------|
| Menquinone biosynthesis               | I   | Demethylmenquinone-8                                                   | dMmEQ-8              | —      | — | Neutral    | Hydrophobic | 50 | 70 | 2  |    |   |   |  |    |  |  | 702.5376 | —        | Neutral and/or hydrophobic |
| Ubiquinone biosynthesis               | I   | 3-Demethylubiquinone-8                                                 |                      | C05815 | — | Anion      | Hydrophobic | 48 | 72 | 4  |    |   |   |  |    |  |  | 712.5431 | 711.5358 | Neutral and/or hydrophobic |
| NudB (in vitro)                       | VI  | Deoxyadenine-5'-phosphate                                              | dAMP                 | C00360 | + | Cation     | Hydrophilic | 10 | 14 | 5  | 6  | 1 |   |  |    |  |  | 331.0682 | 332.0754 | Neutral and/or hydrophobic |
| Purine biosynthesis                   | I   | Deoxyadenine-5'-triphosphate                                           | dATP                 | C00131 | + | Nucleotide | Hydrophilic | 10 | 16 | 5  | 12 | 3 |   |  |    |  |  | 491.0008 | 489.9936 |                            |
| Salvage of Ade, HypXan                | I   | Deoxyadenosine                                                         | dAdenosine           | C00559 | + | Cation     | Hydrophilic | 10 | 13 | 5  | 3  |   |   |  |    |  |  | 251.1018 | 252.1091 |                            |
| Purine biosynthesis                   | I   | Deoxyadenosine-5'-diphosphate                                          | dADP                 | C00206 | + | Nucleotide | Hydrophilic | 10 | 15 | 5  | 9  | 2 |   |  |    |  |  | 411.0345 | 410.0272 |                            |
| Chorismic acid biosynthesis           | I   | 3-Deoxy-D-arabinoheptulosonate-7-phosphate                             | 3DAH7P               | C04691 | — | Anion      | Hydrophilic | 7  | 13 | 10 | 10 | 1 |   |  |    |  |  | 288.0246 | 287.0174 |                            |
| Pyrimidine biosynthesis               | I   | Deoxycytidine-5'-diphosphate                                           | dCDP                 | C00705 | + | Nucleotide | Hydrophilic | 9  | 15 | 3  | 10 | 2 |   |  |    |  |  | 387.0233 | 386.0160 |                            |
| Salvage of pyrimidine                 | I   | Deoxycytidine                                                          | dCyt                 | C00881 | + | Cation     | Hydrophilic | 9  | 13 | 3  | 4  |   |   |  |    |  |  | 227.0926 | 228.0979 |                            |
| NudB (in vitro)                       | VI  | deoxycytidine-5'-phosphate                                             | dCMP                 | C00239 | + | Nucleotide | Hydrophilic | 9  | 14 | 3  | 7  | 1 |   |  |    |  |  | 307.0569 | 306.0497 |                            |
| Pyrimidine biosynthesis               | I   | Deoxycytidine-5'-triphosphate                                          | dCTP                 | C00458 | + | Nucleotide | Hydrophilic | 9  | 18 | 3  | 13 | 3 |   |  |    |  |  | 469.0053 | 467.9980 |                            |
| Salvage of Gua, Xan                   | I   | Deoxyguanosine                                                         | dGuanosine           | C00330 | + | Cation     | Hydrophilic | 10 | 13 | 5  | 4  |   |   |  |    |  |  | 267.0968 | 268.1040 |                            |
| NudB (in vitro)                       | VI  | Deoxyguanosine-5'-phosphate                                            | dGMP                 | C00362 | + | Nucleotide | Hydrophilic | 10 | 14 | 5  | 7  | 1 |   |  |    |  |  | 347.0631 | 346.0558 |                            |
| Purine biosynthesis                   | I   | Deoxyguanosine-5'-triphosphate                                         | dGTP                 | C00286 | + | Nucleotide | Hydrophilic | 10 | 15 | 5  | 13 | 3 |   |  |    |  |  | 505.9879 | 504.9807 |                            |
| Purine biosynthesis                   | I   | Deoxyguanosone-5'-diphosphate                                          | dGDP                 | C00361 | + | Nucleotide | Hydrophilic | 10 | 15 | 5  | 10 | 2 |   |  |    |  |  | 427.0294 | 426.0221 |                            |
| Salvage of Ade, HypXan                | I   | Deoxyinosine                                                           | dInosine             | C05512 | + | Cation     | Hydrophilic | 10 | 12 | 4  | 4  |   |   |  |    |  |  | 252.0859 | 253.0931 |                            |
| ITP, XTP dephosphorelation            | IV  | Deoxyinosine-5'-phosphate                                              | dIMP                 | C06196 | + | Nucleotide | Hydrophilic | 10 | 13 | 4  | 7  | 1 |   |  |    |  |  | 332.0522 | 331.0449 |                            |
| ITP, XTP dephosphorelation            | IV  | Deoxyinosine-5'-triphosphate                                           | dITP                 | C01345 | + | Nucleotide | Hydrophilic | 10 | 15 | 4  | 13 | 3 |   |  |    |  |  | 491.9849 | 490.9776 |                            |
| KDO biosynthesis                      | I   | 3-Deoxy-D-mannoctulosonate-8-phosphate                                 | DManOP               | C04478 | — | Anion      | Hydrophilic | 8  | 15 | 11 | 1  |   |   |  |    |  |  | 318.0352 | 317.0279 |                            |
| KDO biosynthesis                      | I   | 3-Deoxy-D-manno-octulosonic acid                                       | DManOA               | C01187 | — | Anion      | Hydrophilic | 8  | 14 | 8  |    |   |   |  |    |  |  | 238.0689 | 237.0616 |                            |
| Salvage of Gua, Xan                   | I   | Deoxyribose-1-phosphate                                                | dR1P                 | C00672 | + | Anion      | Hydrophilic | 5  | 11 | 7  | 1  |   |   |  |    |  |  | 214.0242 | 213.0170 |                            |
| Ribosephosphate degradation           | II  | Deoxyribose-5-phosphate                                                | dR5P                 | C00673 | + | Anion      | Hydrophilic | 5  | 11 | 7  | 1  |   |   |  |    |  |  | 214.0242 | 213.0170 |                            |
| Pyrimidine biosynthesis               | I   | Deoxythymidine-5'-phosphate                                            | dTMP                 | C00364 | + | Nucleotide | Hydrophilic | 10 | 15 | 2  | 8  | 1 |   |  |    |  |  | 322.0566 | 321.0493 |                            |
| Pyrimidine biosynthesis               | I   | Deoxythymidine-5'-triphosphate                                         | dTTP                 | C00459 | + | Nucleotide | Hydrophilic | 10 | 17 | 2  | 14 | 3 |   |  |    |  |  | 481.9893 | 480.9820 |                            |
| Pyrimidine biosynthesis               | I   | Deoxythymidine-5'-diphosphate                                          | dTDP                 | C00363 | + | Nucleotide | Hydrophilic | 10 | 16 | 2  | 11 | 2 |   |  |    |  |  | 402.0229 | 401.0157 |                            |
| Salvage of pyrimidine                 | I   | Deoxyuridine                                                           | dUrid                | C00526 | + | Cation     | Hydrophilic | 9  | 12 | 2  | 5  |   |   |  |    |  |  | 228.0746 | 229.0819 |                            |
| Pyrimidine biosynthesis               | I   | Deoxyuridine-5'-diphosphate                                            | dUDP                 | C01346 | + | Nucleotide | Hydrophilic | 9  | 14 | 2  | 11 | 2 |   |  |    |  |  | 388.0073 | 387.0000 |                            |
| Pyrimidine biosynthesis               | I   | Deoxyuridine-5'-phosphate                                              | dUMP                 | C00365 | + | Nucleotide | Hydrophilic | 9  | 13 | 2  | 8  | 1 |   |  |    |  |  | 308.0410 | 307.0337 |                            |
| Pyrimidine biosynthesis               | I   | Deoxyuridine-5'-triphosphate                                           | dUTP                 | C00460 | + | Nucleotide | Hydrophilic | 9  | 15 | 2  | 14 | 3 |   |  |    |  |  | 467.9736 | 466.9663 |                            |
| 1-Deoxy-D-xylulose assimilation       | III | 1-Deoxy-D-xylulose                                                     | dXylulose            | C06257 | — | Neutral    | Hydrophilic | 5  | 10 | 4  |    |   |   |  |    |  |  | 134.0579 | —        | Neutral and/or hydrophobic |
| Pyridoxal-5'-phosphate biosynthesis   | I   | 1-Deoxy-D-xylulose-5-phosphate                                         | 1DX5P                | C11437 | — | Anion      | Hydrophilic | 5  | 11 | 7  |    |   |   |  |    |  |  | 214.0242 | 213.0170 |                            |
| CoA biosynthesis                      | I   | Dephospho-CoA                                                          | dePCoA               | C00882 | + | Nucleotide | Hydrophilic | 21 | 35 | 7  | 13 | 2 | 1 |  |    |  |  | 687.1489 | 686.1416 |                            |
| Biotin biosynthesis                   | I   | Dethiobiotin                                                           |                      | C01909 | + | Cation     | Hydrophilic | 10 | 18 | 2  | 3  |   |   |  |    |  |  | 214.1317 | 215.1390 |                            |
| Acetoin biosynthesis                  | I   | Diacetyl                                                               |                      | C00741 | + | Neutral    | Hydrophilic | 4  | 6  | 2  |    |   |   |  |    |  |  | 86.0368  | —        | Neutral and/or hydrophobic |
| Chitobiose transport                  | III | Diacetylchitobiose-6-phosphate                                         | Diacetylchitobiose6P | —      | — | Anion      | Hydrophilic | 16 | 29 | 2  | 15 | 1 |   |  |    |  |  | 520.1306 | 519.1233 |                            |
| Fravrin biosynthesis                  | I   | 2,5-Diamino-6-(ribosylamino)-4-(3H)-pyrimidinone-5-phosphate           | 2_5DA6RA4P5P         | C01304 | — | Anion      | Hydrophilic | 9  | 16 | 5  | 8  | 1 |   |  |    |  |  | 353.0737 | 352.0664 |                            |
| Biotin biosynthesis                   | I   | 7,8-Diaminononanoic acid                                               | 7_8DANA              | C01037 | — | Cation     | Hydrophilic | 9  | 20 | 2  | 2  |   |   |  |    |  |  | 188.1525 | 189.1598 |                            |
| Lysine biosynthesis                   | I   | L,L-Diaminopimelic acid                                                | DPA                  | C00666 | + | Anion      | Hydrophilic | 7  | 14 | 2  | 4  |   |   |  |    |  |  | 190.9954 | 189.0881 |                            |
| Lysine biosynthesis                   | I   | meso-Diaminopimelic acid                                               | meso-DPA             | C00680 | — | Anion      | Hydrophilic | 7  | 14 | 2  | 4  |   |   |  |    |  |  | 190.9954 | 189.0881 |                            |
| YgeX                                  | VI  | 2,3-Diaminopropionic acid                                              |                      | C06393 | + | Cation     | Hydrophilic | 3  | 8  | 2  | 2  |   |   |  |    |  |  | 104.0586 | 105.0659 |                            |
| Enterobactin biosynthesis             | IV  | 2,3-Dihydro-2,3-dihydroxybenzoic acid                                  |                      | C04171 | — | Anion      | Hydrophilic | 7  | 8  | 4  |    |   |   |  |    |  |  | 156.0423 | 155.0350 |                            |
| Phenylacetic acid degradation         | III | cis-Dihydrodiol derivative of phenylacetyl-CoA                         |                      | —      | — | Nucleotide | Hydrophilic | 29 | 44 | 7  | 19 | 3 | 1 |  |    |  |  | 919.1626 | 918.1553 |                            |
| Lysine biosynthesis                   | I   | L,2,3-Dihydrodipicolinic acid                                          | 2_3-DPA              | C03340 | — | Anion      | Hydrophilic | 7  | 7  | 1  | 4  |   |   |  |    |  |  | 169.0375 | 168.0302 |                            |
| Tetrahydrofolic acid biosynthesis     | I   | 7,8-Dihydrofolic acid                                                  | DHFA                 | C00415 | + | Cation     | Hydrophilic | 19 | 21 | 7  | 6  |   |   |  |    |  |  | 443.1553 | 444.1626 |                            |
| Dihydrofolic acid analog (in vitro)   | VI  | Dihydrofolic acid                                                      | DHFA                 | C00579 | — | Cation     | Hydrophilic | 8  | 17 | 1  | 1  | 2 |   |  |    |  |  | 207.0752 | 208.0824 |                            |
| Lipic acid recycling                  | III | Dihydrofolic acid                                                      | DHLA                 | C02147 | — | Anion      | Hydrophilic | 8  | 16 | 2  | 2  |   |   |  |    |  |  | 208.0592 | 207.0519 |                            |
| Tetrahydrofolic acid biosynthesis     | I   | Dihydroneopterin-3'-triphosphate                                       | DHMTTP               | —      | — | Nucleotide | Hydrophilic | 9  | 16 | 5  | 13 | 3 |   |  |    |  |  | 494.9958 | 493.9885 |                            |
| Tetrahydrofolic acid biosynthesis     | I   | 7,8-Dihydroneopterin                                                   | DHN                  | C04874 | + | Cation     | Hydrophilic | 9  | 13 | 5  | 4  |   |   |  |    |  |  | 255.0968 | 256.1040 |                            |
| Tetrahydrofolic acid biosynthesis     | I   | Dihydroneopterinophosphate                                             | DHNMP                | C05925 | — | Nucleotide | Hydrophilic | 9  | 14 | 5  | 7  | 1 |   |  |    |  |  | 335.0631 | 334.0558 |                            |
| Tetrahydrofolic acid biosynthesis     | I   | 7,8-Dihydroneopterin-3'-triphosphate                                   | DHNTP                | C04895 | — | Nucleotide | Hydrophilic | 9  | 16 | 5  | 13 | 3 |   |  |    |  |  | 494.9958 | 493.9885 |                            |
| Pyrimidine biosynthesis               | I   | Dihydroorotic acid                                                     |                      | C00337 | + | Anion      | Hydrophilic | 5  | 6  | 2  | 4  |   |   |  |    |  |  | 158.0328 | 157.0255 |                            |
| Dihydropterin regeneration (in vitro) | VI  | 6,7-Dihydropteridine                                                   |                      | C05649 | — | Cation     | Hydrophilic | 6  | 6  | 4  |    |   |   |  |    |  |  | 134.0592 | 135.0665 |                            |
| Tetrahydrofolic acid biosynthesis     | I   | 7,8-Dihydropteroic acid                                                | DHPA                 | C00921 | — | Cation     | Hydrophilic | 14 | 14 | 6  | 3  |   |   |  |    |  |  | 314.1127 | 315.1200 |                            |
| YeiA, YeiT, YgfK (putative)           | VI  | Dihydrouracil                                                          |                      | C00429 | + | Neutral    | Hydrophilic | 4  | 6  | 2  | 2  |   |   |  |    |  |  | 114.0429 | —        | Neutral and/or hydrophobic |
| Glycerol degradation                  | III | Dihydroxyacetone                                                       |                      | C00184 | + | Neutral    | Hydrophilic | 3  | 6  | 3  |    |   |   |  |    |  |  | 90.0317  | —        | Neutral and/or hydrophobic |
| Glycolysis (Embden-Meyerhof-Parnas)   | I   | Dihydroxyacetonephosphate                                              | DHAP                 | C00111 | + | Anion      | Hydrophilic | 3  | 7  | 6  | 1  |   |   |  |    |  |  | 169.9980 | 168.9908 |                            |
| Enterobactin biosynthesis             | IV  | 2,3-Dihydroxybenzoic acid                                              |                      | C00196 | + | Anion      | Hydrophilic | 7  | 6  | 4  |    |   |   |  |    |  |  | 154.0266 | 153.0193 |                            |
| Enterobactin biosynthesis             | IV  | (2,3-Dihydroxybenzoyl)adenylic acid                                    |                      | C04030 | — | Anion      | Hydrophilic | 17 | 18 | 5  | 10 | 1 |   |  |    |  |  | 483.0791 | 482.0719 |                            |
| Enterobactin degradation              | IV  | 2,3-Dihydroxybenzoylserine                                             | 2_3DHBSer            | C04204 | — | Anion      | Hydrophilic | 10 | 11 | 1  | 6  |   |   |  |    |  |  | 241.0586 | 240.0514 |                            |
| Fravrin biosynthesis                  | I   | 3,4-Dihydroxy-2-butanone-4-phosphate                                   | 3_4D2B4P             | C15556 | — | Anion      | Hydrophilic | 4  | 9  | 6  | 1  |   |   |  |    |  |  | 184.0137 | 183.0064 |                            |
| Valine biosynthesis                   | I   | 2,3-Dihydroxyisovaleric acid                                           | 2_3-DIV              | C04039 | — | Anion      | Hydrophilic | 5  | 10 | 4  |    |   |   |  |    |  |  | 134.0579 | 133.0506 |                            |
| Isoleucine biosynthesis               | I   | 2,3-Dihydroxy-3-methylvaleric acid                                     | 2_3DH3MVA            | C04104 | — | Anion      | Hydrophilic | 6  | 12 | 4  |    |   |   |  |    |  |  | 148.0736 | 147.0663 |                            |
| Menquinone biosynthesis               | I   | 1,4-Dihydroxy-2-naphthoic acid                                         | 1_4DHNapha           | C03657 | + | Anion      | Hydrophilic | 11 | 8  | 4  |    |   |   |  |    |  |  | 204.0423 | 203.0350 |                            |
| HdhA (in vitro)                       | VI  | 3- $\alpha$ ,12- $\alpha$ -Dihydroxy-7-oxo-5- $\beta$ -cholanolic acid |                      | C04643 | — | Anion      | Hydrophilic | 24 | 38 | 5  |    |   |   |  |    |  |  | 406.2719 | 405.2646 |                            |
| Phenylpropionic acid degradation      | III | 3-(2,3-Dihydroxyphenyl)propionic acid                                  |                      | C04044 | — | Anion      | Hydrophilic | 9  | 10 | 4  |    |   |   |  |    |  |  | 182.0579 | 181.0506 |                            |
| Ketogluconic acid metabolism          | III | 2,5-Diketeto-D-gluconic acid                                           |                      | C02780 | — | Anion      | Hydrophilic | 6  | 8  | 7  |    |   |   |  |    |  |  | 192.0270 | 191.0197 |                            |
| YiaK                                  | VI  | 2,3-Diketeto-L-gulononic acid                                          |                      | C04575 | — | Anion      | Hydrophilic | 6  | 8  | 7  |    |   |   |  |    |  |  | 192.0270 | 191.0197 |                            |
| Anaerobic respiration                 | IV  | Dimethyl sulfide                                                       |                      | C00580 | + | Neutral    | Hydrophilic | 2  | 6  |    |    | 1 |   |  |    |  |  | 62.0190  | —        | Neutral and/or hydrophobic |
| Isopeptidylphosphate biosynthesis     | I   | Dimethylallylpyrophosphate                                             | DMAProp              | C00235 | + | Anion      | Hydrophilic | 5  | 12 | 7  | 2  |   |   |  |    |  |  | 246.0058 | 244.9986 |                            |
| Cobalamin biosynthesis                | IV  | Dimethylbenzimidazole                                                  |                      | C03114 | + | Cation     | Hydrophilic | 9  | 10 | 2  |    |   |   |  | </ |  |  |          |          |                            |

|                                              |     |                                                         |                     |        |   |            |             |     |     |    |    |   |   |  |  |  |           |           |                                   |
|----------------------------------------------|-----|---------------------------------------------------------|---------------------|--------|---|------------|-------------|-----|-----|----|----|---|---|--|--|--|-----------|-----------|-----------------------------------|
| ppGpp degradation                            | V   | Guanosine-3'-phosphate 5'-phosphate                     | pGp                 | —      | + | Nucleotide | Hydrophilic | 10  | 15  | 5  | 11 | 2 |   |  |  |  | 443.0243  | 442.0171  | Catalytic enzyme is unidentified. |
| Purine biosynthesis                          | I   | Guanosine-5'-triphosphate                               | GTP                 | C00044 | + | Nucleotide | Hydrophilic | 10  | 16  | 5  | 14 | 3 |   |  |  |  | 522.9907  | 521.9834  |                                   |
| Inorganic metabolite                         | I   | H <sub>2</sub> O                                        |                     | C00001 | — |            |             |     |     |    |    |   |   |  |  |  | 18.0106   |           | Solvent                           |
| Arginine biosynthesis                        | I   | HCO <sub>3</sub> <sup>-</sup>                           |                     | C00288 | + | Anion      | Hydrophilic | 1   | 1   | 3  |    |   |   |  |  |  | 60.9926   | 59.9853   | Volatile                          |
| Proto- and siroheme biosynthesis             | I   | Heme O                                                  |                     | C15672 | — | Anion      | Hydrophobic | 49  | 58  | 4  | 5  |   | 1 |  |  |  | 836.3660  | 835.3527  | Neutral and/or hydrophobic        |
| Histidine biosynthesis                       | I   | L-Histidinol                                            |                     | C01929 | — | Cation     | Hydrophilic | 6   | 9   | 3  | 1  |   |   |  |  |  | 139.0746  | 140.0818  | Intermediate of reaction          |
| Histidine biosynthesis                       | I   | L-Histidine                                             |                     | C00135 | + | Cation     | Hydrophilic | 6   | 9   | 3  | 2  |   |   |  |  |  | 155.0695  | 156.0768  |                                   |
| Histidine biosynthesis                       | I   | L-Histidinol                                            |                     | C00860 | + | Cation     | Hydrophilic | 6   | 11  | 3  | 1  |   |   |  |  |  | 141.0902  | 142.0975  |                                   |
| Histidine biosynthesis                       | I   | L-Histidinolphosphate                                   |                     | C01100 | — | Nucleotide | Hydrophilic | 6   | 12  | 3  | 4  | 1 |   |  |  |  | 221.0565  | 220.0493  |                                   |
| Methionine biosynthesis                      | I   | Homocysteine                                            |                     | C05330 | — | Cation     | Hydrophilic | 4   | 9   | 1  | 2  | 1 |   |  |  |  | 135.0354  | 136.0427  |                                   |
| Homoserine biosynthesis                      | I   | L-Homoserine                                            |                     | C00263 | + | Cation     | Hydrophilic | 4   | 9   | 1  | 3  |   |   |  |  |  | 119.0582  | 120.0655  |                                   |
| Homoserine transport                         | III | Homoserine lactone                                      |                     | —      | — | Cation     | Hydrophilic | 4   | 7   | 1  | 2  |   |   |  |  |  | 101.0477  | 102.0550  |                                   |
| Sulfuric acid assimilation                   | I   | Hydrogen sulfide                                        |                     | C00283 | — | Cation     | Hydrophilic | 2   | 2   |    |    | 1 |   |  |  |  | 33.9877   | 34.9950   | Out of the MS range               |
| Phenylacetic acid degradation                | III | 3-Hydroxyadipyl-CoA                                     |                     | C14145 | — | Nucleotide | Hydrophilic | 27  | 44  | 7  | 20 | 3 | 1 |  |  |  | 911.1575  | 910.1502  |                                   |
| Ubiquinone biosynthesis                      | I   | <i>p</i> -Hydroxybenzoic acid                           | PHBA                | C00156 | + | Anion      | Hydrophilic | 7   | 6   | 3  |    |   |   |  |  |  | 138.0317  | 137.0244  |                                   |
| Thiamine biosynthesis                        | I   | 4-Hydroxybenzylalcohol                                  | 4Hben-ol            | —      | — | Neutral    | Hydrophilic | 7   | 8   | 2  |    |   |   |  |  |  | 124.0524  | —         | Neutral and/or hydrophobic        |
| Oxidation of nucleotides by reactive oxygen  | III | 2-Hydroxydeoxyadenosine-5'-triphosphate                 |                     | —      | — | Nucleotide | Hydrophilic | 10  | 16  | 5  | 13 | 3 |   |  |  |  | 506.9958  | 505.9885  |                                   |
| Oxidation of nucleotides by reactive oxygen  | III | 8-Hydroxydeoxyguanosine-5'-triphosphate                 |                     | —      | — | Nucleotide | Hydrophilic | 10  | 16  | 5  | 14 | 3 |   |  |  |  | 522.9907  | 521.9834  |                                   |
| 2-Oxoglutaric acid reduction (in vitro)      | VI  | ( <i>R</i> )-2-Hydroxyglutaric acid                     |                     | C01087 | — | Anion      | Hydrophilic | 5   | 8   | 5  |    |   |   |  |  |  | 148.0372  | 147.0299  |                                   |
| Propionic acid anabolism                     | III | ( <i>S</i> )-2-Hydroxyglutaric acid                     |                     | C02630 | — | Anion      | Hydrophilic | 5   | 8   | 5  |    |   |   |  |  |  | 148.0372  | 147.0299  |                                   |
| L-4-Hydroxy-2-keto-glutaric acid degradation | III | L-4-Hydroxy-2-keto-glutaric acid                        |                     | C01127 | — | Anion      | Hydrophilic | 5   | 6   | 6  |    |   |   |  |  |  | 162.0164  | 161.0092  |                                   |
| Phenylpropionic acid degradation             | III | 2-Hydroxy-6-ketono-2,4-diene-1,9-dicarboxylic acid      |                     | C04479 | — | Anion      | Hydrophilic | 9   | 10  | 6  |    |   |   |  |  |  | 214.0477  | 213.0405  |                                   |
| Phenylpropionic acid degradation             | III | 4-Hydroxy-2-ketovaleric acid                            |                     | C03589 | — | Anion      | Hydrophilic | 5   | 8   | 4  |    |   |   |  |  |  | 132.0423  | 131.0350  |                                   |
| Isopentenylidiphosphate biosynthesis         | I   | 1-Hydroxy-2-methyl-2-( <i>E</i> )-butenyl-4-diphosphate | HMeBuPP             | C11811 | — | Anion      | Hydrophilic | 5   | 12  | 8  | 2  |   |   |  |  |  | 262.0007  | 260.9935  |                                   |
| Proto- and siroheme biosynthesis             | I   | Hydroxymethylbilane                                     | HMB                 | C01024 | — | Anion      | Hydrophilic | 40  | 46  | 4  | 17 |   |   |  |  |  | 854.2858  | 853.2785  |                                   |
| Tetrahydrofolic acid biosynthesis            | I   | 6-Hydroxymethyldehydropterin                            | HMeDHP              | C01300 | — | Cation     | Hydrophilic | 7   | 9   | 5  | 2  |   |   |  |  |  | 196.0829  | 196.0829  |                                   |
| FrmA (in vitro)                              | VI  | 5-Hydroxymethylglutathione                              |                     | C14180 | — | Cation     | Hydrophilic | 11  | 19  | 3  | 7  | 1 |   |  |  |  | 337.0944  | 338.1017  |                                   |
| Thiamine biosynthesis                        | I   | Hydroxymethylpyrimidine                                 | HMePyr              | C01279 | — | Cation     | Hydrophilic | 6   | 9   | 3  | 1  |   |   |  |  |  | 139.0746  | 140.0818  |                                   |
| Thiamine biosynthesis                        | I   | Hydroxymethylpyrimidinediphosphate                      | HMePyrP             | C04956 | — | Anion      | Hydrophilic | 6   | 10  | 3  | 4  | 1 |   |  |  |  | 219.0409  | 218.0336  |                                   |
| Phenylpropionic acid degradation             | III | 3-(2-Hydroxyphenyl)propionic acid                       | 3HP                 | C01198 | — | Anion      | Hydrophilic | 9   | 10  | 3  |    |   |   |  |  |  | 166.0630  | 165.0557  |                                   |
| Phenylpropionic acid degradation             | III | 3-(3-Hydroxyphenyl)propionic acid                       |                     | C11457 | — | Anion      | Hydrophilic | 9   | 10  | 3  |    |   |   |  |  |  | 166.0630  | 165.0557  |                                   |
| HyuA (in vitro)                              | VI  | Hydroxyphenylthioantoin                                 |                     | —      | — | Cation     | Hydrophilic | 9   | 8   | 2  | 3  |   |   |  |  |  | 192.0535  | 193.0608  |                                   |
| Tyrosine biosynthesis                        | I   | <i>p</i> -Hydroxyphenylpyruvic acid                     | HPP                 | C01179 | + | Anion      | Hydrophilic | 9   | 8   | 4  |    |   |   |  |  |  | 180.0423  | 179.0350  |                                   |
| Pyridoxal-5'-phosphate biosynthesis          | I   | 3-Hydroxy-4-phospho-hydroxy- $\alpha$ -ketobutyric acid | 3H4PHKBA            | —      | — | Anion      | Hydrophilic | 4   | 6   | 8  | 1  |   |   |  |  |  | 212.9800  | 211.9728  |                                   |
| Glycolic acid degradation                    | III | Hydroxypyruvic acid                                     |                     | C00168 | + | Anion      | Hydrophilic | 3   | 4   | 4  |    |   |   |  |  |  | 104.0110  | 103.0037  |                                   |
| Salvage of Ade, HypXan                       | I   | Hypoxanthine                                            |                     | C00262 | + | Cation     | Hydrophilic | 5   | 4   | 4  | 1  |   |   |  |  |  | 136.0385  | 137.0458  |                                   |
| Ketogluconic acid metabolism                 | III | L-Idonic acid                                           |                     | C00770 | — | Anion      | Hydrophilic | 6   | 12  | 7  |    |   |   |  |  |  | 196.0583  | 195.0510  |                                   |
| Histidine degradation                        | II  | Imidazole lactic acid                                   | Im-lactate          | C05568 | — | Cation     | Hydrophilic | 6   | 8   | 2  | 3  |   |   |  |  |  | 156.0535  | 157.0608  |                                   |
| Histidine biosynthesis                       | I   | Imidazoleacetolphosphate                                | IAP                 | C01267 | — | Nucleotide | Hydrophilic | 6   | 9   | 2  | 5  | 1 |   |  |  |  | 220.0249  | 219.0176  |                                   |
| Histidine degradation                        | II  | Imidazolepyruvic acid                                   | Im-pyruvic acid     | C03277 | — | Cation     | Hydrophilic | 6   | 6   | 2  | 3  |   |   |  |  |  | 154.0372  | 155.0451  |                                   |
| NAD biosynthesis                             | I   | Iminoaspartic acid                                      |                     | C05840 | — | Cation     | Hydrophilic | 4   | 5   | 1  | 4  |   |   |  |  |  | 131.0219  | 132.0291  |                                   |
| Tryptophan biosynthesis                      | I   | Indole                                                  |                     | C00463 | + | Cation     | Hydrophilic | 8   | 7   | 1  |    |   |   |  |  |  | 117.0578  | 118.0651  |                                   |
| Tryptophan biosynthesis                      | I   | Indole-3-glycerolphosphate                              | IG-P                | C03506 | — | Nucleotide | Hydrophilic | 11  | 14  | 1  | 6  | 1 |   |  |  |  | 287.0559  | 286.0486  |                                   |
| Salvage of Ade, HypXan                       | I   | Inosine                                                 |                     | C00294 | + | Cation     | Hydrophilic | 10  | 12  | 4  | 5  |   |   |  |  |  | 268.0808  | 269.0880  |                                   |
| Purine biosynthesis                          | I   | Inosine-5'-phosphate                                    | IMP                 | C00130 | + | Nucleotide | Hydrophilic | 10  | 13  | 4  | 8  | 1 |   |  |  |  | 348.0471  | 347.0398  |                                   |
| ITP, XTP dephosphorelation                   | IV  | Inosine-5'-triphosphate                                 | ITP                 | C00081 | + | Nucleotide | Hydrophilic | 10  | 15  | 4  | 14 | 3 |   |  |  |  | 507.9798  | 506.9725  |                                   |
| Inositol utilization (SuhB)                  | VI  | <i>myo</i> -Inositol                                    |                     | C00137 | + | Neutral    | Hydrophilic | 6   | 12  | 6  |    |   |   |  |  |  | 180.0634  | —         | Neutral and/or hydrophobic        |
| Phytic acid degradation                      | III | <i>myo</i> -Inositolhexakisphosphate                    |                     | C01204 | + | Nucleotide | Hydrophilic | 6   | 18  | 24 | 6  |   |   |  |  |  | 659.8614  | 658.8541  |                                   |
| Phytic acid degradation                      | III | <i>D-myo</i> -Inositol-1,2,3,4,5-pentakisphosphate      |                     | C04579 | — | Nucleotide | Hydrophilic | 6   | 17  | 21 | 5  |   |   |  |  |  | 579.8951  | 578.8878  |                                   |
| Phytic acid degradation                      | III | <i>D-myo</i> -Inositol-1,2,4,5,6-pentakisphosphate      |                     | C04563 | — | Nucleotide | Hydrophilic | 6   | 17  | 21 | 5  |   |   |  |  |  | 579.8951  | 578.8878  |                                   |
| Inositol utilization (SuhB)                  | VI  | 1L- <i>myo</i> -Inositol-1-phosphate                    |                     | C04006 | — | Anion      | Hydrophilic | 6   | 13  | 9  | 1  |   |   |  |  |  | 260.0297  | 259.0224  |                                   |
| Inositol utilization (SuhB)                  | VI  | 1D- <i>myo</i> -Inositol-1-phosphate                    |                     | C01177 | — | Anion      | Hydrophilic | 6   | 13  | 9  | 1  |   |   |  |  |  | 260.0297  | 259.0224  |                                   |
| Phytic acid degradation                      | III | <i>D-myo</i> -Inositol-2,3,4,5-tetraphosphate           |                     | —      | — | Nucleotide | Hydrophilic | 6   | 16  | 18 | 4  |   |   |  |  |  | 499.9287  | 498.9214  |                                   |
| Phytic acid degradation                      | III | <i>D-myo</i> -Inositol-2,4,5-triphosphate               |                     | —      | — | Nucleotide | Hydrophilic | 6   | 15  | 15 | 3  |   |   |  |  |  | 419.9624  | 418.9551  |                                   |
| Menaquinone biosynthesis                     | I   | Ischorismic acid                                        |                     | C00885 | — | Anion      | Hydrophilic | 10  | 10  | 6  |    |   |   |  |  |  | 226.0477  | 225.0405  |                                   |
| TCA cycle                                    | I   | Isocitric acid                                          |                     | C00311 | + | Nucleotide | Hydrophilic | 6   | 8   | 7  |    |   |   |  |  |  | 192.0270  | 191.0197  |                                   |
| Isoleucine biosynthesis                      | I   | L-Isoleucine                                            | Ile                 | C00407 | + | Cation     | Hydrophilic | 6   | 13  | 1  | 2  |   |   |  |  |  | 131.0946  | 132.1019  |                                   |
| Isopentenylidiphosphate biosynthesis         | I   | $\Delta^3$ -Isopentenylidiphosphate                     | IPPP                | C00129 | — | Anion      | Hydrophilic | 5   | 12  | 7  | 2  |   |   |  |  |  | 246.0058  | 244.9986  |                                   |
| Leucine biosynthesis                         | I   | 2-Isopropylmalic acid                                   | 2IPMA               | C02504 | + | Anion      | Hydrophilic | 7   | 12  | 5  |    |   |   |  |  |  | 176.0685  | 175.0612  |                                   |
| Leucine biosynthesis                         | I   | 3-Isopropylmalic acid                                   | 3IPMA               | C04411 | — | Anion      | Hydrophilic | 7   | 12  | 5  |    |   |   |  |  |  | 176.0685  | 175.0612  |                                   |
| Leucine biosynthesis                         | I   | 2-Isopropyl-3-oxosuccinic acid                          | 2IPJOSA             | —      | — | Anion      | Hydrophilic | 7   | 10  | 5  |    |   |   |  |  |  | 174.0528  | 173.0455  |                                   |
| AidA (in vitro)                              | VI  | Isovaleryl-CoA                                          |                     | C02939 | — | Nucleotide | Hydrophilic | 26  | 44  | 7  | 17 | 3 | 1 |  |  |  | 851.1727  | 850.1655  |                                   |
| LipidA biosynthesis                          | I   | KDO2-(lauroyl)-lipid IVA                                | KDO2-Lau-lipid IVA  | C06251 | — | Nucleotide | Hydrophobic | 96  | 176 | 2  | 38 | 2 |   |  |  |  | 2027.1376 | 2026.1304 | Out of the MS range               |
| LipidA biosynthesis                          | I   | KDO2-lipid A                                            |                     | C06026 | — | Nucleotide | Hydrophobic | 110 | 202 | 2  | 39 | 2 |   |  |  |  | 2237.3360 | 2236.3287 | Out of the MS range               |
| LipidA biosynthesis                          | I   | KDO2-lipid A, cold adapted                              | KDO2-lipid A (cold) | —      | — | Nucleotide | Hydrophobic | 114 | 208 | 2  | 39 | 2 |   |  |  |  | 2291.3830 | 2290.3757 | Out of the MS range               |
| KDO biosynthesis                             | I   | KDO2-lipid IVA                                          |                     | C06025 | — | Nucleotide | Hydrophobic | 84  | 154 | 2  | 37 | 2 |   |  |  |  | 1844.9706 | 1843.9633 | Out of the MS range               |
| LipidA biosynthesis                          | I   | KDO2-(palmitoleoyl)-lipid IVA                           | KDO2-Pal-lipid IVA  | —      | — | Nucleotide | Hydrophobic | 100 | 182 | 2  | 38 | 2 |   |  |  |  | 2081.1846 | 2080.1773 | Out of the MS range               |
| KDO biosynthesis                             | I   | (KDO)-lipid IVA                                         |                     | C06024 | — | Nucleotide | Hydrophobic | 84  | 154 | 2  | 37 | 2 |   |  |  |  | 1844.9706 | 1843.9633 | Out of the MS range               |
| Phenylacetic acid degradation                | III | $\beta$ -Ketoaldipyl-CoA                                |                     | C02232 | — | Nucleotide | Hydrophilic | 27  | 42  | 7  | 20 | 3 | 1 |  |  |  | 909.1478  | 908.1346  |                                   |
| Galactaric acid degradation                  | III | 5-Keto-4-deoxy-D-glucaric acid                          |                     | C00679 | — | Anion      | Hydrophilic | 6   | 8   | 7  |    |   |   |  |  |  | 192.0270  | 191.0197  |                                   |
| Entner-Doudoroff pathway                     | I   | 2-Keto-3-deoxy-6-phosphogluconic acid                   | KDPGcA              | C04442 | — | Anion      | Hydrophilic | 6   | 11  | 9  | 1  |   |   |  |  |  | 258.0141  | 257.0068  |                                   |
| Ketogluconic acid metabolism                 | III | 5-Ketogluconic acid                                     |                     | C01062 | — | Anion      | Hydrophilic | 6   | 10  | 7  |    |   |   |  |  |  | 194.0427  | 193.0354  |                                   |
| Ascorbic acid degradation                    | III | 3-Keto-L-gulonate-6-phosphate                           |                     | C14899 | — | Anion      | Hydrophilic | 6   | 11  | 10 | 1  |   |   |  |  |  | 274.0090  | 273.0017  |                                   |
| Ketogluconic acid metabolism                 | III | 2-Keto-L-gulonate acid                                  |                     | C15673 | — | Anion      | Hydrophilic | 6   | 10  | 7  |    |   |   |  |  |  | 194.0427  | 193.0354  |                                   |
| Ascorbic acid degradation                    | III | 3-Keto-L-gulonic acid                                   |                     | C00618 | — | Anion      | Hydrophilic | 6   | 10  | 7  |    |   |   |  |  |  | 194.0427  | 193.0354  |                                   |
| Leucine biosynthesis                         | I   | 2-Ketoisovaleric acid                                   | 2KICA               | C00233 | + | Anion      | Hydrophilic | 6   | 10  | 3  |    |   |   |  |  |  | 130.0630  | 129.0557  |                                   |
| Valine biosynthesis                          | I   | 2-Ketoisovaleric acid                                   | 2-KIV               | C00141 | + | Anion      | Hydrophilic | 5   | 8   | 3  |    |   |   |  |  |  | 116.0473  | 115.0401  |                                   |
| Isoleucine biosynthesis                      | I   | 2-Keto-3-methylvaleric acid                             | 2K3MVA              | C03465 | + | Anion      | Hydrophilic | 6   | 10  | 3  |    |   |   |  |  |  | 130.0630  | 129.0557  |                                   |
| Methylglyoxal pathway                        | I   | D-Lactaldehyde                                          | Lactaldehyde        | C00424 | — | Neutral    | Hydrophilic | 3   | 6   | 2  |    |   |   |  |  |  | 74.0368   | —         | Neutral and/or hydrophobic        |
| Methylglyoxal pathway                        | I   | D-Lactic acid                                           |                     | C00256 | + | Anion      | Hydrophilic | 3   | 6   | 3  |    |   |   |  |  |  | 90.0317   | 89.0244   |                                   |
| Lactic acid fermentation                     | I   | L-Lactic acid                                           | Lactic acid         | C01432 | — | Anion      | Hydrophilic | 3   | 6   | 3  |    |   |   |  |  |  | 90.0317   | 89.0244   |                                   |
| Lactose degradation                          | III | Lactose                                                 |                     | C00243 | + | Neutral    | Hydrophilic | 12  | 22  | 11 |    |   |   |  |  |  | 342.1162  | —         | Neutral and/or hydrophobic        |
| Methylglyoxal pathway                        | I   | 5-Lactoylglutathione                                    | SL-GSH              | C03451 | + | Cation     | Hydrophilic | 13  | 21  | 3  | 8  | 1 |   |  |  |  | 379.1049  | 380.1122  |                                   |
| Leucine biosynthesis                         | I   | L-Leucine                                               | Leu                 | C00123 | + | Cation     | Hydrophilic | 6   | 13  | 1  | 2  |   |   |  |  |  |           |           |                                   |

|                                                |     |                                                            |                         |  |        |   |            |             |    |    |    |    |   |   |  |  |  |  |  |          |          |          |                                |
|------------------------------------------------|-----|------------------------------------------------------------|-------------------------|--|--------|---|------------|-------------|----|----|----|----|---|---|--|--|--|--|--|----------|----------|----------|--------------------------------|
| Allantoin degradation                          | III | Oxalureatic acid                                           |                         |  | C00802 | - | Anion      | Hydrophilic | 3  | 4  | 2  | 4  |   |   |  |  |  |  |  | 132.0171 | 131.0098 |          |                                |
| Oxalic acid degradation                        | III | Oxalyl-CoA                                                 |                         |  | C00313 | - | Nucleotide | Hydrophilic | 23 | 36 | 7  | 19 | 3 | 1 |  |  |  |  |  |          | 839.1000 | 838.0927 |                                |
| Isoleucine biosynthesis                        | I   | 2-Oxobutanoic acid                                         | 2-OBa                   |  | C00109 | + | Anion      | Hydrophilic | 4  | 6  | 3  |    |   |   |  |  |  |  |  |          | 102.0317 | 101.0244 |                                |
| TCA cycle                                      | I   | 2-Oxoglutaric acid                                         | 2-OG                    |  | C00026 | + | Anion      | Hydrophilic | 5  | 6  | 3  |    |   |   |  |  |  |  |  |          | 146.0215 | 145.0142 |                                |
| Phenylpropionic acid degradation               | III | 2-Oxopent-4-enoic acid                                     |                         |  | C00596 | - | Anion      | Hydrophilic | 5  | 6  | 3  |    |   |   |  |  |  |  |  |          | 114.0317 | 113.0244 |                                |
| PldC (in vitro)                                | VI  | Palmitic acid                                              |                         |  | C00249 | + | Anion      | Hydrophilic | 16 | 32 | 2  |    |   |   |  |  |  |  |  |          | 256.2402 | 255.2330 |                                |
| CoA biosynthesis                               | I   | Pantetheine-4-phosphate                                    | P4P                     |  | C01134 | - | Nucleotide | Hydrophilic | 11 | 23 | 2  | 7  | 1 | 1 |  |  |  |  |  |          | 358.0964 | 357.0891 |                                |
| Pantothenic acid biosynthesis                  | I   | L-Pantoic acid                                             | Pantoic acid            |  | C00522 | - | Anion      | Hydrophilic | 6  | 12 | 4  |    |   |   |  |  |  |  |  |          | 148.0736 | 147.0663 |                                |
| Pantothenic acid biosynthesis                  | I   | Pantothenic acid                                           |                         |  | C00864 | + | Anion      | Hydrophilic | 9  | 17 | 1  | 5  |   |   |  |  |  |  |  |          | 219.1107 | 218.1034 |                                |
| 3-Hydroxybutyryl-CoA synthetase (B-specific)   | VI  | Pantoyllactone                                             |                         |  | C01012 | + | Neutral    | Hydrophilic | 6  | 10 | 3  |    |   |   |  |  |  |  |  |          | 130.0630 | -        | Neutral and/or hydrophobic     |
| Phenylethylamine degradation                   | III | Phenylacetaldehyde                                         |                         |  | C00601 | + | Neutral    | Hydrophilic | 8  | 8  | 1  |    |   |   |  |  |  |  |  |          | 120.0575 | -        | Neutral and/or hydrophobic     |
| Phenylacetic acid degradation                  | III | Phenylacetic acid                                          |                         |  | C07086 | - | Anion      | Hydrophilic | 8  | 8  | 2  |    |   |   |  |  |  |  |  |          | 136.0524 | 135.0452 |                                |
| Phenylacetic acid degradation                  | III | Phenylacetyl-CoA                                           |                         |  | C00582 | + | Nucleotide | Hydrophilic | 29 | 42 | 7  | 17 | 3 | 1 |  |  |  |  |  |          | 885.1571 | 884.1498 |                                |
| D-Amino acids degradation                      | III | D-Phenylalanine                                            | D-Phe                   |  | C02265 | - | Cation     | Hydrophilic | 9  | 11 | 1  | 2  |   |   |  |  |  |  |  |          | 165.0790 | 166.0863 |                                |
| Phenylalanine biosynthesis                     | I   | L-Phenylalanine                                            | Phe                     |  | C00079 | + | Cation     | Hydrophilic | 9  | 11 | 1  | 2  |   |   |  |  |  |  |  |          | 165.0790 | 166.0863 |                                |
| Phenylethylamine degradation                   | III | Phenylethylamine                                           |                         |  | C05332 | + | Cation     | Hydrophilic | 8  | 11 | 1  |    |   |   |  |  |  |  |  |          | 121.0891 | 122.0964 |                                |
| HyuA (in vitro)                                | VI  | Phenylhydantoin                                            |                         |  | -      | - | Cation     | Hydrophilic | 9  | 8  | 2  | 2  |   |   |  |  |  |  |  |          | 176.0586 | 177.0659 |                                |
| Phenylpropionic acid degradation               | III | 3-Phenylpropionic acid                                     | PPA                     |  | C05629 | + | Anion      | Hydrophilic | 9  | 10 | 2  |    |   |   |  |  |  |  |  |          | 150.0681 | 149.0608 |                                |
| Phenylalanine biosynthesis                     | I   | Phenylpyruvic acid                                         |                         |  | C00166 | + | Anion      | Hydrophilic | 9  | 8  | 3  |    |   |   |  |  |  |  |  |          | 164.0473 | 163.0401 |                                |
| Sulfuric acid assimilation                     | I   | 3'-Phosphoadenosine-5'-phosphosulfate                      | PAPS                    |  | C00053 | - | Nucleotide | Hydrophilic | 10 | 15 | 5  | 13 | 2 | 1 |  |  |  |  |  |          | 506.9862 | 505.9790 |                                |
| Glycolysis (Embden-Meyerhof-Parnas)            | I   | Phosphoenolpyruvic acid                                    | PEP                     |  | C00074 | + | Anion      | Hydrophilic | 3  | 5  | 6  | 1  |   |   |  |  |  |  |  |          | 167.9824 | 166.9751 |                                |
| Pentose phosphate pathway (oxidative)          | I   | 6-Phospho-D-gluconic acid                                  | 6-PG                    |  | C00345 | + | Anion      | Hydrophilic | 6  | 13 | 10 | 1  |   |   |  |  |  |  |  |          | 276.0246 | 275.0174 |                                |
| 6-Phospho-β-glucosidase (cryptic)              | VI  | 6-Phospho-β-D-glucoside-(1,4)-D-glucose                    |                         |  | -      | - | Anion      | Hydrophilic | 12 | 23 | 14 | 1  |   |   |  |  |  |  |  |          | 422.0825 | 421.0753 |                                |
| Glycolysis (Embden-Meyerhof-Parnas)            | I   | 2-Phosphoglyceric acid                                     | 2-PG                    |  | C00631 | + | Anion      | Hydrophilic | 3  | 7  | 7  | 1  |   |   |  |  |  |  |  |          | 185.9929 | 184.9857 |                                |
| Glycolysis (Embden-Meyerhof-Parnas)            | I   | 3-Phosphoglyceric acid                                     | 3-PG                    |  | C00597 | + | Anion      | Hydrophilic | 3  | 7  | 7  | 1  |   |   |  |  |  |  |  |          | 185.9929 | 184.9857 |                                |
| Gph (in vitro)                                 | VI  | 2-Phosphoglyceric acid                                     |                         |  | C00988 | - | Anion      | Hydrophilic | 2  | 5  | 6  | 1  |   |   |  |  |  |  |  |          | 155.9824 | 154.9751 |                                |
| Threonine biosynthesis                         | I   | O-Phospho-L-homoserine                                     | P-HomoSer               |  | C01102 | - | Anion      | Hydrophilic | 4  | 10 | 1  | 6  | 1 |   |  |  |  |  |  |          | 199.0246 | 198.0173 |                                |
| Serine biosynthesis                            | I   | 3-Phosphohydroxypyruvic acid                               | 3PHPA                   |  | C03232 | - | Anion      | Hydrophilic | 3  | 5  | 7  | 1  |   |   |  |  |  |  |  |          | 183.9773 | 182.9700 |                                |
| Pyridoxal-5'-phosphate biosynthesis            | I   | Phosphohydroxythreonine                                    | PHThr                   |  | -      | - | Anion      | Hydrophilic | 4  | 9  | 1  | 7  | 1 |   |  |  |  |  |  |          | 214.0117 | 213.0044 |                                |
| CoA biosynthesis                               | I   | D-4-Phosphopantothenic acid                                | 4PPA                    |  | C03492 | - | Nucleotide | Hydrophilic | 9  | 18 | 1  | 8  | 1 |   |  |  |  |  |  |          | 299.0770 | 298.0697 |                                |
| CoA biosynthesis                               | I   | 4'-Phospho-N-pantothenoylcysteine                          | 4PPC                    |  | C04352 | - | Nucleotide | Hydrophilic | 12 | 23 | 2  | 9  | 1 |   |  |  |  |  |  |          | 402.0862 | 401.0789 |                                |
| Purine biosynthesis                            | I   | 5-Phosphoribosylamine                                      | PRA                     |  | C03090 | - | Nucleotide | Hydrophilic | 5  | 12 | 1  | 7  | 1 |   |  |  |  |  |  |          | 229.0351 | 228.0279 |                                |
| Histidine biosynthesis                         | I   | Phosphoribosyl-AMP                                         | PR-AMP                  |  | C02741 | - | Nucleotide | Hydrophilic | 15 | 23 | 5  | 14 | 2 |   |  |  |  |  |  |          | 559.0717 | 558.0644 |                                |
| Tryptophan biosynthesis                        | I   | N-(5-Phosphoribosyl)anthranilic acid                       | PRAnth                  |  | C04302 | - | Nucleotide | Hydrophilic | 12 | 16 | 1  | 9  | 1 |   |  |  |  |  |  |          | 349.0563 | 348.0490 |                                |
| Histidine biosynthesis                         | I   | Phosphoribosyl-ATP                                         | PR-ATP                  |  | C02739 | - | Nucleotide | Hydrophilic | 15 | 25 | 5  | 20 | 4 |   |  |  |  |  |  |          | 719.0043 | 717.9971 |                                |
| Purine biosynthesis                            | I   | 5-Phosphoribosyl-4-carboxy-5-aminoimidazole                | CAIR                    |  | C04751 | - | Nucleotide | Hydrophilic | 9  | 14 | 3  | 9  | 1 |   |  |  |  |  |  |          | 339.0468 | 338.0395 |                                |
| PRPP biosynthesis                              | I   | 5-Phosphoribosylidiphosphate                               | PRPP                    |  | C00119 | + | Nucleotide | Hydrophilic | 5  | 13 | 14 | 3  |   |   |  |  |  |  |  |          | 389.9518 | 388.9445 |                                |
| Purine biosynthesis                            | I   | Phosphoribosylformamidocarboxamide                         | FAICAR                  |  | -      | - | Nucleotide | Hydrophilic | 10 | 15 | 4  | 9  | 1 |   |  |  |  |  |  |          | 366.0577 | 365.0504 |                                |
| Histidine biosynthesis                         | I   | Phosphoribosylformimino-AICAR-phosphate                    | PRFAP                   |  | C04896 | - | Nucleotide | Hydrophilic | 15 | 25 | 5  | 15 | 2 |   |  |  |  |  |  |          | 577.0822 | 576.0750 |                                |
| Purine biosynthesis                            | I   | 5-Phosphoribosyl-N-formylglycineamide                      | FGAR                    |  | C04376 | - | Nucleotide | Hydrophilic | 8  | 15 | 2  | 9  | 1 |   |  |  |  |  |  |          | 314.0515 | 313.0442 |                                |
| Purine biosynthesis                            | I   | 5-Phosphoribosyl-N-formylglycineamide                      | FGAM                    |  | C04640 | - | Nucleotide | Hydrophilic | 8  | 16 | 3  | 8  | 1 |   |  |  |  |  |  |          | 313.0675 | 312.0602 |                                |
| Purine biosynthesis                            | I   | 5-Phosphoribosylglycineamide                               | GAR                     |  | C03838 | - | Nucleotide | Hydrophilic | 7  | 15 | 2  | 8  | 1 |   |  |  |  |  |  |          | 286.0566 | 285.0493 |                                |
| Purine biosynthesis                            | I   | 5-Phosphoribosyl-4-(N-succinocarboxamide)-5-aminoimidazole | SAICAR                  |  | C04823 | - | Nucleotide | Hydrophilic | 13 | 19 | 4  | 12 | 1 |   |  |  |  |  |  |          | 454.0737 | 453.0664 |                                |
| Histidine biosynthesis                         | I   | Phosphoribosylformimino-AICAR-phosphate                    | PRuFAP                  |  | C04916 | - | Nucleotide | Hydrophilic | 15 | 25 | 5  | 15 | 2 |   |  |  |  |  |  |          | 577.0822 | 576.0750 |                                |
| Serine biosynthesis                            | I   | 3-Phosphoserine                                            | 3PSer                   |  | C01005 | + | Anion      | Hydrophilic | 3  | 8  | 1  | 6  | 1 |   |  |  |  |  |  |          | 185.0089 | 184.0017 |                                |
| Biotin biosynthesis                            | I   | Pimelic acid                                               |                         |  | C02656 | + | Anion      | Hydrophilic | 7  | 12 | 4  |    |   |   |  |  |  |  |  |          | 160.0736 | 159.0663 |                                |
| Biotin biosynthesis                            | I   | Pimeloyl-CoA                                               |                         |  | C01063 | - | Nucleotide | Hydrophilic | 28 | 46 | 7  | 19 | 3 | 1 |  |  |  |  |  |          | 909.1782 | 908.1709 |                                |
| Proto- and siroheme biosynthesis               | I   | Porphobilinogen                                            |                         |  | C00931 | + | Cation     | Hydrophilic | 10 | 14 | 2  | 4  |   |   |  |  |  |  |  |          | 226.0954 | 227.1026 |                                |
| Proto- and siroheme biosynthesis               | I   | Precorrin-1                                                |                         |  | C15527 | - | Anion      | Hydrophilic | 41 | 46 | 4  | 16 |   |   |  |  |  |  |  |          | 850.2929 | 849.2836 |                                |
| Proto- and siroheme biosynthesis               | I   | Precorrin-2                                                |                         |  | C02463 | - | Anion      | Hydrophilic | 42 | 48 | 4  | 16 |   |   |  |  |  |  |  |          | 864.3065 | 863.2993 |                                |
| Molybdopterin biosynthesis                     | I   | Precursor-Z                                                | Precursor-Z             |  | -      | - | Cation     | Hydrophilic | 10 | 12 | 5  | 7  | 1 |   |  |  |  |  |  |          | 345.0474 | 346.0547 |                                |
| Prephenic acid biosynthesis                    | I   | Prephenic acid                                             |                         |  | C00254 | + | Anion      | Hydrophilic | 10 | 10 | 6  |    |   |   |  |  |  |  |  |          | 226.0477 | 225.0405 |                                |
| Proline biosynthesis                           | I   | L-Proline                                                  | Pro                     |  | C00148 | + | Cation     | Hydrophilic | 5  | 9  | 1  | 2  |   |   |  |  |  |  |  |          | 115.0633 | 116.0706 |                                |
| Fucose degradation                             | III | Propane-1,2-diol                                           |                         |  | C00583 | + | Neutral    | Hydrophilic | 3  | 8  | 2  |    |   |   |  |  |  |  |  |          | 76.0524  | -        | Neutral and/or hydrophobic     |
| Threonine degradation                          | II  | Propionic acid                                             |                         |  | C00163 | + | Anion      | Hydrophilic | 3  | 6  | 2  |    |   |   |  |  |  |  |  |          | 74.0368  | 73.0295  |                                |
| Threonine degradation                          | II  | Propionyl-CoA                                              |                         |  | C00100 | + | Nucleotide | Hydrophilic | 24 | 40 | 7  | 17 | 3 | 1 |  |  |  |  |  |          | 823.1414 | 822.1342 |                                |
| Threonine degradation                          | II  | Propionylphosphate                                         | Propionyl-P             |  | C02876 | - | Anion      | Hydrophilic | 3  | 7  | 5  | 1  |   |   |  |  |  |  |  |          | 154.0031 | 152.9958 |                                |
| Proto- and siroheme biosynthesis               | I   | Protoheme IX                                               |                         |  | C00032 | - | Anion      | Hydrophilic | 34 | 32 | 4  | 4  |   |   |  |  |  |  |  |          | 614.1616 | 613.1544 | Detected as divalent ion in MS |
| Proto- and siroheme biosynthesis               | I   | Protoporphyrin IX                                          | Por IX                  |  | C02191 | + | Anion      | Hydrophilic | 34 | 34 | 4  | 4  |   |   |  |  |  |  |  |          | 562.2580 | 561.2507 |                                |
| Proto- and siroheme biosynthesis               | I   | Protoporphyrinogen IX                                      |                         |  | C01079 | - | Anion      | Hydrophilic | 34 | 40 | 4  | 4  |   |   |  |  |  |  |  |          | 564.2737 | 563.2664 |                                |
| Pseudouridine 5'-phosphate biosynthesis (rRNA) | I   | Pseudouridine-5'-phosphate                                 | Pseudo5P                |  | C01168 | - | Nucleotide | Hydrophilic | 9  | 13 | 2  | 9  | 1 |   |  |  |  |  |  |          | 324.0359 | 323.0286 | Modified tRNA                  |
| Polyamine biosynthesis                         | I   | Putrescine                                                 |                         |  | C00134 | + | Cation     | Hydrophilic | 4  | 12 | 2  |    |   |   |  |  |  |  |  |          | 88.1000  | 89.1073  |                                |
| Pyrazinamide degradation                       | III | Pyrazinamide                                               |                         |  | C01956 | + | Cation     | Hydrophilic | 5  | 5  | 3  | 1  |   |   |  |  |  |  |  |          | 123.0433 | 124.0505 |                                |
| Pyrazinamide degradation                       | III | Pyrazinic acid                                             |                         |  | -      | - | Cation     | Hydrophilic | 5  | 4  | 2  | 2  |   |   |  |  |  |  |  |          | 124.0273 | 125.0346 |                                |
| Salvage of pyridoxal-5'-phosphate              | I   | Pyridoxal                                                  |                         |  | C00250 | + | Cation     | Hydrophilic | 8  | 9  | 1  | 3  |   |   |  |  |  |  |  |          | 167.0582 | 168.0655 |                                |
| Pyridoxal-5'-phosphate biosynthesis            | I   | Pyridoxal-5'-phosphate                                     | Pyr5P                   |  | C00018 | + | Anion      | Hydrophilic | 8  | 10 | 1  | 6  | 1 |   |  |  |  |  |  |          | 247.0246 | 246.0173 |                                |
| Salvage of pyridoxal-6'-phosphate              | I   | Pyridoxamine                                               |                         |  | C00534 | + | Cation     | Hydrophilic | 8  | 12 | 2  | 2  |   |   |  |  |  |  |  |          | 168.0899 | 169.0972 |                                |
| Salvage of pyridoxal-7'-phosphate              | I   | Pyridoxamine-5'-phosphate                                  | PX5P                    |  | C00647 | + | Anion      | Hydrophilic | 8  | 13 | 2  | 5  | 1 |   |  |  |  |  |  |          | 248.0562 | 247.0489 |                                |
| Salvage of pyridoxal-8'-phosphate              | I   | Pyridoxine                                                 |                         |  | C00314 | + | Cation     | Hydrophilic | 8  | 11 | 1  | 3  |   |   |  |  |  |  |  |          | 169.0739 | 170.0812 |                                |
| Pyridoxal-5'-phosphate biosynthesis            | I   | Pyridoxine-5'-phosphate                                    | Pyn5P                   |  | C00627 | - | Anion      | Hydrophilic | 8  | 12 | 1  | 6  | 1 |   |  |  |  |  |  |          | 249.0402 | 248.0330 |                                |
| Inorganic metabolite                           | I   | Pyrophosphate                                              | PPi                     |  | C00013 | + | Anion      | Hydrophilic | 4  | 4  | 2  | 2  |   |   |  |  |  |  |  |          | 177.9432 | 176.9360 |                                |
| Proline biosynthesis                           | I   | L-Δ <sup>1</sup> -Pyrroline-5-carboxylic acid              | Pyrroline-5-carboxylate |  | C03912 | + | Anion      | Hydrophilic | 5  | 7  | 1  | 2  |   |   |  |  |  |  |  |          | 113.0472 | 112.0404 |                                |
| Quinones (pathway unknown)                     | V   | Pyroloquinolinequinone                                     | PQQ                     |  | C00113 | + | Anion      | Hydrophilic | 14 | 6  | 2  | 8  |   |   |  |  |  |  |  |          | 330.0124 | 329.0051 |                                |
| Glycolysis (Embden-Meyerhof-Parnas)            | I   | Pyruvic acid                                               |                         |  | C00022 | + | Anion      | Hydrophilic | 3  | 4  | 3  |    |   |   |  |  |  |  |  |          | 88.0160  | 87.0088  |                                |
| Queuine biosynthesis (tRNA)                    | I   | Queuine                                                    |                         |  | -      | - | Cation     | Hydrophilic | 12 | 15 | 5  | 3  |   |   |  |  |  |  |  |          | 277.1175 | 278.1248 | Modified tRNA                  |
| NAD biosynthesis                               | I   | Quinolnic acid                                             |                         |  | C03722 | + | Anion      | Hydrophilic | 7  | 5  | 1  | 4  |   |   |  |  |  |  |  |          | 167.0219 | 166.0146 |                                |
| Rhamnose degradation                           | III | L-Rhamnose</                                               |                         |  |        |   |            |             |    |    |    |    |   |   |  |  |  |  |  |          |          |          |                                |

|                                           |     |                                                                                                              |                             |        |         |             |             |             |     |    |    |    |  |  |  |  |  |          |           |                            |                            |
|-------------------------------------------|-----|--------------------------------------------------------------------------------------------------------------|-----------------------------|--------|---------|-------------|-------------|-------------|-----|----|----|----|--|--|--|--|--|----------|-----------|----------------------------|----------------------------|
| Quinones (pathway unknown)                | V   | Ubiquinone-2                                                                                                 | CoQ2                        | --     | --      | Neutral     | Hydrophobic | 24          | 34  | 4  |    |    |  |  |  |  |  | 386.2457 | --        | Neutral and/or hydrophobic |                            |
| Quinones (pathway unknown)                | V   | Ubiquinone-3                                                                                                 | CoQ3                        | --     | --      | Neutral     | Hydrophobic | 29          | 42  | 4  |    |    |  |  |  |  |  |          | 454.3083  | --                         | Neutral and/or hydrophobic |
| Quinones (pathway unknown)                | V   | Ubiquinone-4                                                                                                 | CoQ4                        | --     | --      | Neutral     | Hydrophobic | 34          | 50  | 4  |    |    |  |  |  |  |  |          | 522.3709  | --                         | Neutral and/or hydrophobic |
| Quinones (pathway unknown)                | V   | Ubiquinone-5                                                                                                 | CoQ5                        | --     | --      | Neutral     | Hydrophobic | 39          | 58  | 4  |    |    |  |  |  |  |  |          | 590.4335  | --                         | Neutral and/or hydrophobic |
| Quinones (pathway unknown)                | V   | Ubiquinone-6                                                                                                 |                             | --     | --      | Neutral     | Hydrophobic | 39          | 58  | 4  |    |    |  |  |  |  |  |          | 590.4335  | --                         | Neutral and/or hydrophobic |
| Quinones (pathway unknown)                | V   | Ubiquinone-6                                                                                                 | CoQ6                        | --     | --      | Neutral     | Hydrophobic | 44          | 66  | 4  |    |    |  |  |  |  |  |          | 658.4961  | --                         | Neutral and/or hydrophobic |
| Quinones (pathway unknown)                | V   | Ubiquinone-7                                                                                                 | CoQ7                        | --     | --      | Neutral     | Hydrophobic | 49          | 74  | 4  |    |    |  |  |  |  |  |          | 726.5587  | --                         | Neutral and/or hydrophobic |
| Ubiquinone biosynthesis                   | I   | Ubiquinone-8                                                                                                 | CoQ8                        | --     | --      | Neutral     | Hydrophobic | 49          | 74  | 4  |    |    |  |  |  |  |  |          | 726.5587  | --                         | Neutral and/or hydrophobic |
| Quinones (pathway unknown)                | V   | Ubiquinone-9                                                                                                 | CoQ9                        | C01967 | +       | Neutral     | Hydrophobic | 59          | 90  | 4  |    |    |  |  |  |  |  |          | 862.6839  | --                         | Neutral and/or hydrophobic |
| Common antigen biosynthesis               | I   | UDP-N-acetyl-D-mannosamine                                                                                   | UDP-ManNAc                  | C01170 | --      | Nucleotide  | Hydrophilic | 17          | 27  | 3  | 17 | 2  |  |  |  |  |  |          | 607.0816  | 606.0743                   |                            |
| Common antigen biosynthesis               | I   | UDP-N-acetyl-D-mannosaminouronic acid                                                                        | UDP-ManNAcUA                | C06240 | --      | Nucleotide  | Hydrophilic | 17          | 25  | 3  | 18 | 2  |  |  |  |  |  |          | 621.0608  | 620.0536                   |                            |
| UDP-N-acetylglucosamine biosynthesis      | I   | UDP-N-acetyl-D-glucosamine                                                                                   | UDP-GlcNAc                  | C00043 | +       | Nucleotide  | Hydrophilic | 17          | 27  | 3  | 17 | 2  |  |  |  |  |  |          | 607.0816  | 606.0743                   |                            |
| Peptidoglycan biosynthesis                | I   | UDP-N-acetylmuramic acid                                                                                     | UDP-MurNAcA                 | C01050 | --      | Nucleotide  | Hydrophilic | 20          | 31  | 3  | 19 | 2  |  |  |  |  |  |          | 679.1027  | 678.0954                   |                            |
| Peptidoglycan biosynthesis                | I   | UDP-N-acetylmuramoyl-L-alanine                                                                               | UDP-MurNAcAla               | C01212 | --      | Nucleotide  | Hydrophilic | 23          | 36  | 4  | 20 | 2  |  |  |  |  |  |          | 750.1398  | 749.1325                   |                            |
| Peptidoglycan biosynthesis                | I   | UDP-N-acetylmuramoyl-L-alanyl-D-glutamic acid                                                                | UDP-GlcNAcMurAlaGlu         | C00692 | --      | Nucleotide  | Hydrophilic | 28          | 43  | 5  | 23 | 2  |  |  |  |  |  |          | 879.1824  | 878.1751                   |                            |
| UshA (in vitro)                           | VI  | UDP-N-acetylmuramoyl-L-alanyl-D-glutamyl-L-lysyl-D-alanyl-D-alanine                                          | C04846                      | --     | --      | Nucleotide  | Hydrophilic | 40          | 65  | 9  | 26 | 2  |  |  |  |  |  |          | 1149.3516 | 1148.3443                  | Out of the MS range        |
| Peptidoglycan biosynthesis                | I   | UDP-N-acetylmuramoyl-L-alanyl-D-glutamyl-meso-2,6-diaminoheptanedioic acid                                   | UDP-GlcNAcMurAlaGluDAHeA    | --     | --      | Nucleotide  | Hydrophilic | 35          | 54  | 7  | 26 | 2  |  |  |  |  |  |          | 1050.2594 | 1049.2521                  | Out of the MS range        |
| Peptidoglycan turnover                    | II  | UDP-N-acetylmuramoyl-L-alanyl-D-glutamyl-meso-2,6-diaminoheptanedioate-D-alanine                             | UDP-MurNAcAlaGluDAHeAAla    | --     | --      | Nucleotide  | Hydrophilic | 38          | 60  | 8  | 27 | 2  |  |  |  |  |  |          | 1122.3043 | 1121.2970                  | Out of the MS range        |
| Peptidoglycan biosynthesis                | I   | UDP-N-acetylmuramoyl-L-alanyl-D-glutamyl-meso-2,6-diaminoheptanedioate-D-alanyl-D-alanine                    | UDP-MurNAcAlaGluDAHeAAlaAla | C04882 | --      | Nucleotide  | Hydrophilic | 41          | 65  | 9  | 28 | 2  |  |  |  |  |  |          | 1193.3414 | 1192.3342                  | Out of the MS range        |
| Modification of lipid A                   | I   | UDP-4-amino-4-deoxy-L-arabinose                                                                              | UDP-Ara4N                   | C16153 | --      | Nucleotide  | Hydrophilic | 14          | 22  | 3  | 15 | 2  |  |  |  |  |  |          | 534.0526  | 533.0453                   |                            |
| KDO biosynthesis                          | I   | UDP-2,3-bis(3-hydroxymyristoyl)glucosamine                                                                   | UDP-BHMyrGlc                | C04652 | --      | Nucleotide  | Hydrophobic | 43          | 77  | 3  | 20 | 2  |  |  |  |  |  |          | 1017.4576 | 1016.4503                  | Out of the MS range        |
| Modification of lipid A                   | I   | UDP-4-(N-formylamino)-4-deoxy-L-arabinose                                                                    | UDP-Ara4FN                  | C16156 | --      | Nucleotide  | Hydrophilic | 15          | 22  | 3  | 16 | 2  |  |  |  |  |  |          | 562.0475  | 561.0403                   |                            |
| O antigen biosynthesis (not in K-12)      | VI  | UDP-D-galacto-1,4-furanose                                                                                   | C03733                      | --     | --      | Nucleotide  | Hydrophilic | 15          | 24  | 2  | 17 | 2  |  |  |  |  |  |          | 566.0550  | 565.0478                   |                            |
| Cholanic acid biosynthesis                | I   | UDP-galactose                                                                                                | UDP-Gal                     | C00052 | +       | Nucleotide  | Hydrophilic | 15          | 24  | 2  | 17 | 2  |  |  |  |  |  |          | 566.0550  | 565.0478                   |                            |
| Peptidoglycan biosynthesis                | I   | UDP-GlcNAc-pyruvateolether                                                                                   | UDP-GlcNAcPyrEE             | C04631 | --      | Nucleotide  | Hydrophilic | 20          | 29  | 3  | 19 | 2  |  |  |  |  |  |          | 677.0871  | 676.0798                   |                            |
| Cholanic acid biosynthesis                | I   | UDP-D-glucose                                                                                                | GDP-Glc                     | C00029 | +       | Nucleotide  | Hydrophilic | 15          | 24  | 2  | 17 | 2  |  |  |  |  |  |          | 566.0550  | 565.0478                   |                            |
| Cholanic acid biosynthesis                | I   | UDP-D-glucuronic acid                                                                                        | GDP-GlcA                    | C00167 | +       | Nucleotide  | Hydrophilic | 15          | 24  | 2  | 18 | 2  |  |  |  |  |  |          | 582.0499  | 581.0427                   |                            |
| KDO biosynthesis                          | I   | UDP-3-O-(3-hydroxymyristoyl)glucosamine                                                                      | UDP-HMyrGlc                 | C06022 | --      | Nucleotide  | Hydrophobic | 29          | 51  | 3  | 18 | 2  |  |  |  |  |  |          | 791.2643  | 790.2570                   | Neutral and/or hydrophobic |
| KDO biosynthesis                          | I   | UDP-3-O-(3-hydroxymyristoyl)-N-acetylglucosamine                                                             | UDP-HMyrGlcNAc              | C04738 | --      | Nucleotide  | Hydrophobic | 31          | 53  | 3  | 19 | 2  |  |  |  |  |  |          | 833.2749  | 832.2676                   | Neutral and/or hydrophobic |
| Modification of lipid A                   | I   | UDP-4-ketopyranose                                                                                           | UDP-Ara4O                   | C16155 | --      | Nucleotide  | Hydrophilic | 14          | 19  | 2  | 16 | 2  |  |  |  |  |  |          | 533.0210  | 532.0137                   |                            |
| Modification of lipid A                   | I   | Undecaprenyl phosphate-4-amino-4-deoxy-L-arabinose                                                           | Undecaprenyl-P-Ara4N        | C16157 | --      | Anion       | Hydrophobic | 60          | 99  | 1  | 7  | 1  |  |  |  |  |  |          | 976.7159  | 975.7086                   | Neutral and/or hydrophobic |
| Isoopenoid biosynthesis                   | I   | Undecaprenyldiphosphate                                                                                      | UPrPP                       | C03543 | --      | Nucleotide  | Hydrophobic | 55          | 92  | 7  | 2  |    |  |  |  |  |  |          | 926.6318  | 925.6246                   | Neutral and/or hydrophobic |
| Common antigen biosynthesis               | I   | Undecaprenyl-N-acetylglucosaminyl-N-acetylmannosaminuronate-4-acetamido-4,6-dideoxy-D-galactosepyrophosphate | UnGlcNAcManNAcAdDGalP       | --     | --      | Nucleotide  | Hydrophobic | 79          | 129 | 3  | 22 | 2  |  |  |  |  |  |          | 1533.8543 | 1532.8470                  | Out of the MS range        |
| Common antigen biosynthesis               | I   | Undecaprenyl-N-acetylglucosaminyl-N-acetylmannosaminuronatepyrophosphate                                     | UnPGlcNAcManNAcNPP          | --     | --      | Nucleotide  | Hydrophobic | 71          | 116 | 2  | 18 | 2  |  |  |  |  |  |          | 1346.7698 | 1345.7626                  | Out of the MS range        |
| Common antigen biosynthesis               | I   | Undecaprenyl-N-acetyl-α-D-glucosaminylpyrophosphate                                                          | UnPrenylGlcNAcPP            | C01289 | --      | Nucleotide  | Hydrophobic | 63          | 105 | 1  | 12 | 2  |  |  |  |  |  |          | 1129.7112 | 1128.7039                  | Out of the MS range        |
| Common antigen biosynthesis               | I   | Undecaprenylphosphate                                                                                        | UnPreP                      | C00348 | --      | Nucleotide  | Hydrophobic | 55          | 91  | 4  | 1  |    |  |  |  |  |  |          | 846.6655  | 845.6582                   | Neutral and/or hydrophobic |
| Peptidoglycan biosynthesis                | I   | Undecaprenyl-pyrophosphoryl-MurNAc-(pentapeptide)-N-acetylglucosamine                                        | UnPPMurNAcPentaPepNAc       | C05898 | --      | Nucleotide  | Hydrophobic | 95          | 156 | 8  | 28 | 2  |  |  |  |  |  |          | 1919.0504 | 1918.0432                  | Out of the MS range        |
| Salvage of pyrimidine                     | I   | Uracil                                                                                                       | C00106                      | +      | Cation  | Hydrophilic | 4           | 4           | 2   | 2  |    |    |  |  |  |  |  |          | 112.0273  | 111.0346                   |                            |
| Polyamine biosynthesis                    | I   | Urea                                                                                                         | C00086                      | +      | Cation  | Hydrophilic | 1           | 4           | 2   | 1  |    |    |  |  |  |  |  |          | 60.0324   | 61.0396                    |                            |
| Allantoin degradation                     | III | (S)-Ureidoglycolic acid                                                                                      | C00603                      | --     | --      | Anion       | Hydrophilic | 3           | 6   | 2  | 4  |    |  |  |  |  |  |          | 134.0328  | 133.0255                   |                            |
| Salvage of Ade, HypXan                    | I   | Uric acid                                                                                                    | C00366                      | +      | Cation  | Hydrophilic | 5           | 4           | 4   | 3  |    |    |  |  |  |  |  |          | 168.0283  | 169.0356                   |                            |
| Salvage of pyrimidine                     | I   | Uridine                                                                                                      | C00299                      | +      | Cation  | Hydrophilic | 9           | 12          | 2   | 6  |    |    |  |  |  |  |  |          | 244.0695  | 245.0768                   |                            |
| Pyrimidine biosynthesis                   | I   | Uridine-5'-diphosphate                                                                                       | UDP                         | C00015 | +       | Nucleotide  | Hydrophilic | 9           | 14  | 2  | 12 | 2  |  |  |  |  |  |          | 404.0022  | 402.9949                   |                            |
| Pyrimidine biosynthesis                   | I   | Uridine-5'-phosphate                                                                                         | UMP                         | C00105 | +       | Nucleotide  | Hydrophilic | 9           | 13  | 2  | 9  | 1  |  |  |  |  |  |          | 324.0359  | 323.0286                   |                            |
| Pyrimidine biosynthesis                   | I   | Uridine-5'-triphosphate                                                                                      | UTP                         | C00075 | +       | Nucleotide  | Hydrophilic | 9           | 15  | 2  | 15 | 3  |  |  |  |  |  |          | 483.9685  | 482.9613                   |                            |
| Proto- and siroheme biosynthesis          | I   | Uroporphyrin III                                                                                             | C02469                      | --     | --      | Anion       | Hydrophilic | 40          | 36  | 4  | 16 |    |  |  |  |  |  |          | 828.2126  | 827.2054                   |                            |
| Proto- and siroheme biosynthesis          | I   | Uroporphyrinogen-III                                                                                         | UroPorgen-III               | C01051 | --      | --          | Anion       | Hydrophilic | 40  | 44 | 4  | 16 |  |  |  |  |  |          | 836.2752  | 835.2680                   |                            |
| Valine biosynthesis                       | I   | L-Valine                                                                                                     | Val                         | C00183 | +       | Cation      | Hydrophilic | 5           | 11  | 1  | 2  |    |  |  |  |  |  |          | 117.0790  | 118.0863                   |                            |
| Salvage of Ade, HypXan                    | I   | Xanthine                                                                                                     | C00385                      | +      | Cation  | Hydrophilic | 5           | 4           | 4   | 2  |    |    |  |  |  |  |  |          | 152.0334  | 153.0407                   |                            |
| Salvage of Gua, Xan                       | I   | Xanthosine                                                                                                   | C01762                      | +      | Cation  | Hydrophilic | 10          | 12          | 4   | 6  |    |    |  |  |  |  |  |          | 284.0757  | 285.0830                   |                            |
| Purine biosynthesis                       | I   | Xanthosine-5-phosphate                                                                                       | XMP                         | C00655 | +       | Anion       | Hydrophilic | 10          | 13  | 4  | 9  | 1  |  |  |  |  |  |          | 364.0420  | 363.0347                   |                            |
| ITP, XTP dephosphorelation                | IV  | Xanthosine-5'-triphosphate                                                                                   | XTP                         | C00700 | +       | Nucleotide  | Hydrophilic | 10          | 15  | 4  | 15 | 3  |  |  |  |  |  |          | 523.9747  | 522.9674                   |                            |
| Xylose degradation                        | III | D-Xylose                                                                                                     | C00181                      | +      | Neutral | Hydrophilic | 5           | 10          | 5   |    |    |    |  |  |  |  |  |          | 150.0528  | --                         | Neutral and/or hydrophobic |
| L-Xylose transport                        | III | L-Xylose                                                                                                     | C01510                      | --     | --      | Neutral     | Hydrophilic | 5           | 10  | 5  |    |    |  |  |  |  |  |          | 150.0528  | --                         | Neutral and/or hydrophobic |
| Xylose degradation                        | III | D-Xylulose                                                                                                   | C00310                      | +      | Neutral | Hydrophilic | 5           | 10          | 5   |    |    |    |  |  |  |  |  |          | 150.0528  | --                         | Neutral and/or hydrophobic |
| L-Xylose degradation                      | III | L-Xylulose                                                                                                   | C00312                      | --     | --      | Neutral     | Hydrophilic | 5           | 10  | 5  |    |    |  |  |  |  |  |          | 150.0528  | --                         | Neutral and/or hydrophobic |
| Pentose phosphate pathway (non-oxidative) | I   | D-Xylulose-5-phosphate                                                                                       | X5P                         | C00231 | +       | Anion       | Hydrophilic | 5           | 11  | 8  | 1  |    |  |  |  |  |  |          | 230.0192  | 229.0119                   |                            |
| Ascorbic acid degradation                 | III | L-Xylulose-5-phosphate                                                                                       | L-X5P                       | C03291 | --      | --          | Anion       | Hydrophilic | 5   | 11 | 8  | 1  |  |  |  |  |  |          | 230.0192  | 229.0119                   |                            |

a Classes; I, primary metabolism; II, degradation of primary metabolites; III, degradation of environmental compounds; IV, secondary or unconventional metabolism; V, pathway unknown; VI, intermediates in putative or in vitro reaction.

b Refer Kyoto Encyclopedia of Genes and Genomes (<http://www.genome.jp/kegg/>)

c Analytical mode is for CE-TOFMS analysis. See Experimental section in detail.

d See Experimental section.

Supplementary Table 2. Intracellular levels of *E. coli* metabolites in primary metabolisms.

| Pathway                                 | Class <sup>a</sup> | Metabolite                                                    | Abbreviation                 | Standard chemical | Analytical mode <sup>c</sup> | Molecular weight | <i>m/z</i> <sup>d</sup> | Map position <sup>e</sup> | Time after His shift down <sup>f</sup> |                |        |        | Description                    |
|-----------------------------------------|--------------------|---------------------------------------------------------------|------------------------------|-------------------|------------------------------|------------------|-------------------------|---------------------------|----------------------------------------|----------------|--------|--------|--------------------------------|
|                                         |                    |                                                               |                              |                   |                              |                  |                         |                           | 0 min                                  | 15 min         | 30 min | 60 min |                                |
| Alanine biosynthesis                    | I                  | L-Alanine                                                     | Ala                          | +                 | Cation                       | 89.0477          | 90.0550                 | C-3                       | 0.1303                                 | 0.3287         | 0.3488 | 0.7112 |                                |
| AppppA biosynthesis                     | I                  | P(1),P(4)-Bis(5'-adenosyl)tetraphosphate                      | AppppA                       | +                 | Nucleotide                   | 836.0483         | 835.0410                | A-1                       | 0.0019                                 | 0.0016         | 0.0009 | 0.0008 |                                |
| Arginine biosynthesis                   | I                  | L-Arginine                                                    | Arg                          | +                 | Cation                       | 174.1117         | 175.1190                | B-4                       | 0.1622                                 | 0.2450         | 0.3125 | 1.0536 |                                |
| Arginine biosynthesis                   | I                  | L-Argininosuccinic acid                                       | ArgSuccinate                 | +                 | Cation                       | 290.1226         | 291.1299                | B-4                       | 0.0057                                 | 0.0283         | 0.0229 | 0.0349 |                                |
| Arginine biosynthesis                   | I                  | Carbamoylphosphate                                            | Carbamoyl-P                  | +                 | Anion                        | 140.9827         | 139.9754                | C-4                       | ND                                     | ND             | ND     | ND     |                                |
| Arginine biosynthesis                   | I                  | L-Citrulline                                                  | Citrulline                   | +                 | Cation                       | 175.0957         | 176.1030                | B-4                       | 0.0307                                 | 0.2098         | 0.1315 | 0.0062 |                                |
| Arginine biosynthesis                   | I                  | <i>N</i> -Acetyl-L-glutamic acid                              | <i>N</i> -AcGlu              | +                 | Cation                       | 189.0637         | 190.0710                | C-4                       | 0.0034                                 | 0.0176         | 0.0338 | 0.0082 |                                |
| Arginine biosynthesis                   | I                  | <i>N</i> -Acetylglutamylphosphate                             | <i>N</i> -AcGlu-P            | +                 | Anion                        | 269.0301         | 268.0228                | C-4                       | UID                                    | UID            | UID    | UID    |                                |
| Arginine biosynthesis                   | I                  | <i>N</i> -Acetylglutamatesemialdehyde                         | <i>N</i> -AcGlu-semialdehyde | +                 | Anion                        | 173.0688         | 172.0615                | C-4                       | UID                                    | UID            | UID    | UID    |                                |
| Arginine biosynthesis                   | I                  | <i>N</i> - $\alpha$ -Acetylmorphine                           | <i>N</i> -AcOrn              | +                 | Cation                       | 174.1004         | 175.1077                | C-4                       | 0.9074                                 | 2.1800         | 0.1719 | 0.0091 |                                |
| Arginine biosynthesis                   | I                  | L-Ornithine                                                   | Ornithine                    | +                 | Cation                       | 132.0899         | 133.0972                | C-4                       | 0.0658                                 | 0.0373         | 0.0249 | 0.0043 |                                |
| Asparagine biosynthesis                 | I                  | L-Asparagine                                                  | Asn                          | +                 | Cation                       | 132.0535         | 133.0608                | B-3                       | 0.0817                                 | 0.0466         | 0.0871 | 0.2083 |                                |
| Aspartic acid biosynthesis              | I                  | L-Aspartic acid                                               | Asp                          | +                 | Cation                       | 133.0375         | 134.0448                | B-3                       | 0.1074                                 | 0.1057         | 0.1393 | 0.3255 |                                |
| Biotin biosynthesis                     | I                  | 7,8-Diaminononanoic acid                                      | 7,8DANA                      | +                 | Cation                       | 188.1525         | 189.1598                | C-2                       | 0.0040                                 | 0.0068         | 0.0037 | 0.0044 |                                |
| Biotin biosynthesis                     | I                  | 8-Amino-7-oxononanoic acid                                    | 8A7ONA                       | +                 | Cation                       | 187.1208         | 188.1281                | C-2                       | UID                                    | UID            | UID    | UID    |                                |
| Biotin biosynthesis                     | I                  | Biotin                                                        | Biotin                       | +                 | Cation                       | 244.0882         | 245.0954                | D-2                       | 0.1057                                 | 0.1339         | 0.1234 | 0.1201 |                                |
| Biotin biosynthesis                     | I                  | Dethiobiotin                                                  | Dethiobiotin                 | +                 | Cation                       | 214.1317         | 215.1390                | C-2                       | 0.0126                                 | 0.0135         | 0.0041 | ND     |                                |
| Biotin biosynthesis                     | I                  | Pimelic acid                                                  | Pimelic acid                 | +                 | Anion                        | 160.0736         | 159.0663                | C-2                       | ND                                     | ND             | ND     | ND     |                                |
| Biotin biosynthesis                     | I                  | Pimeloyl-CoA                                                  | Pimeloyl-CoA                 | +                 | Nucleotide                   | 909.1782         | 908.1709                | C-2                       | UID                                    | UID            | UID    | UID    |                                |
| Biotin biosynthesis                     | I                  | 5-Adenosyl-4-methylthio-2-oxobutanoic acid                    | SA4MT2OBA                    | +                 | Cation                       | 398.1134         | 398.1134                | C-2                       | UID                                    | UID            | UID    | UID    | Including trinary sulfur       |
| Biotin oxidation                        | I                  | <i>d</i> -Biotin- <i>d</i> -sulfoxide                         | BiotinSul                    | +                 | Cation                       | 260.0831         | 261.0904                | D-2                       | UID                                    | UID            | UID    | UID    |                                |
| cAMP biosynthesis                       | I                  | 3',5'-Cyclicadenosine-5'-phosphate                            | cAMP                         | +                 | Nucleotide                   | 329.0525         | 328.0452                | A-1                       | 0.0336                                 | 0.0449         | 0.0446 | 0.0468 |                                |
| cGMP biosynthesis                       | I                  | 3',5'-Cyclicguanosine-5'-phosphate                            | cGMP                         | +                 | Nucleotide                   | 345.0474         | 344.0402                | B-1                       | ND                                     | ND             | ND     | ND     |                                |
| Cholanic acid biosynthesis              | I                  | $\alpha$ -D-Galactose-1-phosphate                             | Gal1P                        | +                 | Anion                        | 260.0297         | 259.0224                | C-1                       | 0.0273                                 | 0.2024         | 0.1826 | 0.2002 |                                |
| Cholanic acid biosynthesis              | I                  | GDP-4-dehydro-6-deoxy-D-mannose                               | GDP-DDMan                    | +                 | Nucleotide                   | 587.0666         | 586.0593                | C-1                       | UID                                    | UID            | UID    | UID    |                                |
| Cholanic acid biosynthesis              | I                  | GDP-L-fucose                                                  | GDP-fucose                   | +                 | Nucleotide                   | 589.0822         | 588.0750                | C-1                       | ND                                     | ND             | ND     | ND     |                                |
| Cholanic acid biosynthesis              | I                  | UDP-D-glucose                                                 | UDP-Glc                      | +                 | Nucleotide                   | 566.0550         | 565.0478                | D-4                       |                                        | See UDP-Gal    |        |        |                                |
| Cholanic acid biosynthesis              | I                  | UDP-D-glucuronic acid                                         | GDP-GlcA                     | +                 | Nucleotide                   | 582.0499         | 581.0427                | D-4                       | ND                                     | ND             | ND     | ND     |                                |
| Cholanic acid biosynthesis              | I                  | GDP-mannose                                                   | GDP-Man                      | +                 | Nucleotide                   | 605.0772         | 604.0699                | C-1                       | ND                                     | ND             | ND     | ND     |                                |
| Cholanic acid biosynthesis              | I                  | D-Mannose-1-phosphate                                         | Man1P                        | +                 | Anion                        | 260.0297         | 259.0224                | C-1                       |                                        | See Gal1P      |        |        |                                |
| Cholanic acid biosynthesis              | I                  | D-Mannose-6-phosphate                                         | Man6P                        | +                 | Anion                        | 260.0297         | 259.0224                | C-1                       |                                        | See Gal1P      |        |        |                                |
| Cholanic acid biosynthesis              | I                  | UDP-galactose                                                 | UDP-galactose                | +                 | Nucleotide                   | 566.0550         | 565.0478                | D-4                       | 0.3853                                 | 1.3488         | 1.2339 | 2.0746 |                                |
| Chorismic acid biosynthesis             | I                  | 3-Deoxy-D-arabinoheptulosonate-7-phosphate                    | 3DAH7P                       | +                 | Anion                        | 288.0246         | 287.0174                | B-2                       | 0.0039                                 | 0.0155         | 0.0083 | 0.0060 |                                |
| Chorismic acid biosynthesis             | I                  | 3-Dehydroquinate acid                                         | 3DQA                         | +                 | Anion                        | 190.0500         | 189.0405                | B-3                       | UID                                    | UID            | UID    | UID    |                                |
| Chorismic acid biosynthesis             | I                  | 3-Dehydroshikimate acid                                       | 3DSA                         | +                 | Anion                        | 172.0372         | 171.0299                | B-3                       | UID                                    | UID            | UID    | UID    |                                |
| Chorismic acid biosynthesis             | I                  | 5-Enolpyruvylshikimate-3-phosphate                            | 5EPS3P                       | +                 | Anion                        | 324.0246         | 323.0174                | B-3                       | 0.0278                                 | 0.0293         | 0.0359 | 0.0496 |                                |
| Chorismic acid biosynthesis             | I                  | Chorismic acid                                                | Chorismic acid               | +                 | Anion                        | 226.0477         | 225.0405                | A-3                       | ND                                     | ND             | ND     | ND     |                                |
| Chorismic acid biosynthesis             | I                  | Shikimate-3-phosphate                                         | S3P                          | +                 | Anion                        | 254.0192         | 253.0119                | B-3                       | UID                                    | 0.0076         | 0.0051 | UID    |                                |
| Chorismic acid biosynthesis             | I                  | Shikimic acid                                                 | Shikimic acid                | +                 | Anion                        | 174.0528         | 173.0455                | B-3                       | ND                                     | ND             | ND     | ND     |                                |
| CoA biosynthesis                        | I                  | D-4-Phosphopantothenic acid                                   | 4PPA                         | +                 | Nucleotide                   | 299.0770         | 298.0697                | D-2                       | UID                                    | UID            | UID    | UID    |                                |
| CoA biosynthesis                        | I                  | 4-Phospho- <i>N</i> -pantothencysteine                        | 4PPC                         | +                 | Nucleotide                   | 402.0862         | 401.0789                | D-2                       | UID                                    | UID            | UID    | UID    |                                |
| CoA biosynthesis                        | I                  | Coenzyme A                                                    | CoA                          | +                 | Nucleotide                   | 767.1152         | 382.5503                | D-2                       | 0.2960                                 | 0.3911         | 0.1867 | 0.4736 | Detected as divalent ion in MS |
| CoA biosynthesis                        | I                  | Dephospho-CoA                                                 | dePCoA                       | +                 | Nucleotide                   | 687.1489         | 686.1416                | D-2                       | 0.0027                                 | 0.0024         | 0.0011 | 0.0025 |                                |
| CoA biosynthesis                        | I                  | Pantetheine-4'-phosphate                                      | P4P                          | +                 | Nucleotide                   | 358.0964         | 357.0891                | D-2                       | 0.0065                                 | 0.0071         | 0.0053 | 0.0081 |                                |
| Common antigen biosynthesis             | I                  | dTDP-4-acetamido-4,6-dideoxy-D-galactose                      | dTDP-AADDGal                 | +                 | Nucleotide                   | 589.1074         | 588.1001                | D-2                       | 0.0032                                 | 0.0059         | 0.0057 | 0.0122 |                                |
| Common antigen biosynthesis             | I                  | dTDP-D-fucosamine                                             | dTDP-FAN                     | +                 | Nucleotide                   | 547.0968         | 546.0896                |                           | UID                                    | UID            | UID    | UID    |                                |
| Common antigen biosynthesis             | I                  | UDP- <i>N</i> -acetyl-D-mannosamine                           | UDP-ManNAc                   | +                 | Nucleotide                   | 607.0816         | 606.0743                |                           |                                        | See UDP-GlcNAc |        |        |                                |
| Common antigen biosynthesis             | I                  | UDP- <i>N</i> -acetyl-D-mannosaminouronic acid                | UDP-ManNAcUA                 | +                 | Nucleotide                   | 621.0608         | 620.0536                |                           | UID                                    | UID            | UID    | UID    |                                |
| Cysteine biosynthesis                   | I                  | <i>O</i> -Acetyl-L-serine                                     | AcSer                        | +                 | Cation                       | 147.0532         | 148.0604                | C-3                       | 0.0278                                 | 0.0173         | 0.0498 | ND     |                                |
| Cysteine biosynthesis                   | I                  | L-Cysteine                                                    | Cys                          | +                 | Cation                       | 121.0198         | 122.0270                | C-3                       | ND                                     | ND             | ND     | ND     |                                |
| dTDP-rhamnose biosynthesis              | I                  | dTDP-4-dehydro-6-deoxy-D-glucose                              | dTDP-DDGlc                   | +                 | Nucleotide                   | 546.0652         | 545.0579                | C-1                       | UID                                    | UID            | UID    | UID    |                                |
| dTDP-rhamnose biosynthesis              | I                  | dTDP-4-dehydro-6-deoxy-L-mannose                              | dTDP-DDMan                   | +                 | Nucleotide                   | 546.0652         | 545.0579                | D-1                       | UID                                    | UID            | UID    | UID    |                                |
| dTDP-rhamnose biosynthesis              | I                  | dTDP-D-glucose                                                | dTDP-Glc                     | +                 | Nucleotide                   | 564.0758         | 563.0685                | C-1                       | 0.0034                                 | 0.0063         | 0.0051 | 0.0050 |                                |
| dTDP-rhamnose biosynthesis              | I                  | dTDP- $\alpha$ -L-rhamnose                                    | dTDP-Rhm                     | +                 | Nucleotide                   | 548.0808         | 547.0736                | D-1                       | 0.3977                                 | 0.5828         | 0.4606 | 0.5994 |                                |
| Entner-Doudoroff pathway                | I                  | 2-Keto-3-deoxy-6-phosphogluconic acid                         | KDPGlcA                      | +                 | Anion                        | 258.0141         | 257.0068                | C-2                       | UID                                    | UID            | UID    | UID    |                                |
| Fatty acid biosynthesis                 | I                  | Malonyl-CoA                                                   | Malonyl-CoA                  | +                 | Nucleotide                   | 853.1156         | 403.5556                | B-3                       | ND                                     | ND             | ND     | ND     | Detected as acetyl-CoA in MS   |
| Formyltetrahydrofolic acid biosynthesis | I                  | 5,10-Methylene-THF                                            | 5,10MeL-THF                  | +                 | Cation                       | 457.1710         | 458.1783                | D-1                       | UID                                    | UID            | UID    | UID    |                                |
| Formyltetrahydrofolic acid biosynthesis | I                  | 5,10-Methenyl-THF                                             | 5,10Me-THF                   | +                 | Cation                       | 457.1704         | 457.1704                | D-1                       | UID                                    | UID            | UID    | UID    | Including quarternary amine    |
| Formyltetrahydrofolic acid biosynthesis | I                  | 5-Methyl-THF                                                  | Me-THF                       | +                 | Cation                       | 459.1866         | 460.1939                | D-1                       | ND                                     | ND             | ND     | ND     |                                |
| Fravrin biosynthesis                    | I                  | 2,5-Diamino-6-(ribosylamino)-4-(3H)-pyrimidinone-5'-phosphate | 2,5DA6RA4P5P                 | +                 | Anion                        | 353.0737         | 352.0664                | B-2                       | UID                                    | UID            | UID    | UID    |                                |
| Fravrin biosynthesis                    | I                  | 3,4-Dihydroxy-2-butanone-4-phosphate                          | 3,4DH2B4P                    | +                 | Anion                        | 184.0137         | 183.0064                | A-2                       | UID                                    | UID            | UID    | UID    |                                |
| Fravrin biosynthesis                    | I                  | 5-Amino-6-(5'-phosphoribosylamino)uracil                      | 5A6-5'PRAU                   | +                 | Anion                        | 354.0577         | 353.0504                | B-2                       | UID                                    | UID            | UID    | UID    |                                |
| Fravrin biosynthesis                    | I                  | 5-Amino-6-(5'-phosphoribitylamino)uracil                      | 5A6-5'PRBU                   | +                 | Anion                        | 356.0733         | 355.0660                | B-2                       | UID                                    | UID            | UID    | UID    |                                |
| Fravrin biosynthesis                    | I                  | 5-Amino-6-ribitylamino-2,4(1H,3H)-pyrimidinedione             | 5A6RbA2,4PD                  | +                 | Cation                       | 276.1070         | 277.1143                | A-2                       | UID                                    | 0.0019         | 0.0014 | 0.0027 |                                |
| Fravrin biosynthesis                    | I                  | 6,7-Dimethyl-8-(1-D-ribityl)lumazine                          | 6,7DH8RBL                    | +                 | Anion                        | 326.1226         | 325.1154                | B-2                       | UID                                    | UID            | UID    | UID    |                                |
| Fravrin biosynthesis                    | I                  | Flavinadeninedinucleotide (oxidized form)                     | FAD                          | +                 | Nucleotide                   | 785.1571         | 391.5713                | B-2                       | 0.0011                                 | 0.0013         | 0.0007 | 0.0007 | Detected as divalent ion in MS |
| Fravrin biosynthesis                    | I                  | Flavinadeninedinucleotide (reduced form)                      | FADH <sub>2</sub>            | +                 | Nucleotide                   | 787.1728         | 786.1655                | A-2                       | UID                                    | UID            | UID    | UID    |                                |
| Fravrin biosynthesis                    | I                  | Flavinmononucleotide (oxidized form)                          | FMN                          | +                 | Nucleotide                   | 456.1046         | 455.0973                | B-2                       | 0.0062                                 | 0.0088         | 0.0030 | 0.0056 |                                |
| Fravrin biosynthesis                    | I                  | Flavinmononucleotide (reduced form)                           | FMNH <sub>2</sub>            | +                 | Nucleotide                   | 458.1203         | 457.1130                | B-2                       | UID                                    | UID            | UID    | UID    |                                |
| Fravrin biosynthesis                    | I                  | Riboflavin                                                    | Riboflavin                   | +                 | Cation                       | 376.1383         | 377.1456                | B-2                       | ND                                     | ND             | ND     | ND     |                                |
| Glutamic acid biosynthesis              | I                  | L-glutamic acid                                               | Glu                          | +                 | Cation                       | 147.0532         | 148.0604                | C-4                       | 3.2033                                 | 8.8863         | 7.8141 | 9.3902 |                                |
| Glutamine biosynthesis                  | I                  | L-Glutamine                                                   | Gln                          | +                 | Cation                       | 146.0691         | 147.0764                | C-4                       | 0.2763                                 | 0.1228         | 0.3678 | 0.5476 |                                |
| Glutathione biosynthesis                | I                  | $\gamma$ -Glutamylcysteine                                    | GluCys                       | +                 | Cation                       | 250.0623         | 251.0696                | C-3                       | 0.0096                                 | 0.0210         | 0.0147 | 0.0118 |                                |
| Glutathione biosynthesis                | I                  | Glutathione (reduced form)                                    | GSH                          | +                 | Cation                       | 307.0838         | 308.0911                | D-3                       | 5.6358                                 | 2.9306         | 1.5100 | 7.3357 |                                |
| Glutathione biosynthesis                | I                  | Glutathione (oxidized form)                                   | GSSG                         | +                 | Cation                       | 612.1520         | 307.0833                | D-3                       | 0.0236                                 | 0.0187         | 0.0196 | 0.0487 | Detected as divalent ion in MS |
| Glutathionylspermidine metabolism       | I                  | Glutathionylspermidine                                        | GSH-spermidine               | +                 | Cation                       | 434.2311         | 435.2384                | D-3                       | 0.0007                                 | UID            | UID    | UID    |                                |
| Glycine biosynthesis                    | I                  | Glycine                                                       | Gly                          | +                 | Cation                       | 75.0320          | 76.0393                 | C-2                       | 0.1901                                 | 0.2894         | 0.2619 | 0.4944 |                                |
| Glycogen biosynthesis                   | I                  | ADP-D-glucose                                                 | ADP-Glc                      | +                 | Nucleotide                   | 589.0822         | 588.0750                | C-2                       | ND                                     | ND             | ND     | ND     |                                |
| Glycogen biosynthesis                   | I                  | $\alpha$ -D-Glucose-1-phosphate                               | G1P                          | +                 | Anion                        | 260.0297         | 259.0224                | C-2                       | ND                                     | ND             | ND     | ND     |                                |
| Glycolysis (Embden-Meyerhof-Parnas)     | I                  | 1,3-Diphosphateglyceric acid                                  | 1,3-DPG                      | +                 | Anion                        | 265.9593         | 264.9520                | C-2                       | ND                                     | ND             | ND     | ND     |                                |
| Glycolysis (Embden-Meyerhof-Parnas)     | I                  | 2-Phosphoglyceric acid                                        | 2-PG                         | +                 | Anion                        | 185.9929         | 184.9857                | C-3                       |                                        | See 3PG        |        |        |                                |
| Glycolysis (Embden-Meyerhof-Parnas)     | I                  | 3-Phosphoglyceric acid                                        | 3-PG                         | +                 | Anion                        | 185.9929         | 184.9857                | C-3                       | 0.1180                                 | 0.1270         | 0.0759 | 0.0764 |                                |
| Glycolysis (Embden-Meyerhof-Parnas)     | I                  | Dihydroxyacetonephosphate                                     | DHAP                         | +                 | Anion                        | 169.9980         | 168.9908                | C-2                       | ND                                     | 0.0150         | 0.0136 | 0.0012 |                                |
| Glycolysis (Embden-Meyerhof-Parnas)     | I                  | D-Fructose-1,6-diphosphate                                    | F1,6P                        | +                 | Anion                        | 339.9961         | 338.9888                | C-2                       | 0.0129                                 | 0.2166         | 0.2631 | 0.0555 |                                |
| Glycolysis (Embden-Meyerhof-Parnas)     | I                  | D-Fructose-6-phosphate                                        | F6P                          | +                 | Anion                        | 260.0297         | 259.0224                | C-2                       | ND                                     | ND             | ND     | ND     |                                |
| Glycolysis (Embd                        |                    |                                                               |                              |                   |                              |                  |                         |                           |                                        |                |        |        |                                |

|                                           |   |                                                           |                          |   |            |          |          |     |        |        |        |                 |
|-------------------------------------------|---|-----------------------------------------------------------|--------------------------|---|------------|----------|----------|-----|--------|--------|--------|-----------------|
| Menaquinone biosynthesis                  | I | 1,4-Dihydroxy-2-naphthoic acid                            | 1,4DHNaphA               | + | Anion      | 204.0423 | 203.0350 | A-4 | ND     | ND     | ND     | ND              |
| Menaquinone biosynthesis                  | I | Isochorismic acid                                         | Isochorismic acid        | - | Anion      | 226.0477 | 225.0405 | A-3 | UID    | UID    | UID    | UID             |
| Menaquinone biosynthesis                  | I | O-Succinylbenzoic acid                                    | OSucBA                   | - | Anion      | 222.0528 | 221.0455 | A-3 | UID    | UID    | UID    | UID             |
| Menaquinone biosynthesis                  | I | O-Succinylbenzoyl-CoA                                     | OSucB-CoA                | - | Nucleotide | 971.1575 | 970.1502 | A-4 | UID    | UID    | UID    | UID             |
| Menaquinone biosynthesis                  | I | 2-Succinyl-6-hydroxy-2,4-cyclohexadiene-1-carboxylic acid | SucCycHexCA              | - | Anion      | 240.0634 | 239.0561 | A-3 | UID    | UID    | UID    | UID             |
| Methionine biosynthesis                   | I | 5-Methyltetrahydropteroyltri-L-glutamic acid              | 5MHTGlu                  | - | Cation     | 640.2453 | 641.2525 | A-3 | UID    | UID    | UID    | UID             |
| Methionine biosynthesis                   | I | Cystathionine                                             | Cystathionine            | - | Cation     | 222.0674 | 223.0747 | A-3 | 0.0091 | 0.0120 | 0.0060 | UID             |
| Methionine biosynthesis                   | I | Homocysteine                                              | HomoCys                  | - | Cation     | 135.0354 | 136.0427 | A-3 | 0.0054 | 0.0066 | 0.0080 | 0.0048          |
| Methionine biosynthesis                   | I | L-Methionine                                              | Met                      | + | Cation     | 149.0511 | 150.0583 | A-4 | 0.0371 | 0.0724 | 0.0654 | 0.0605          |
| Methionine biosynthesis                   | I | O-Succinyl-L-homoserine                                   | SucHomoSer               | + | Cation     | 219.0743 | 220.0816 | A-3 | 0.0379 | 0.0714 | 0.0613 | 0.0079          |
| Methionine biosynthesis                   | I | Tetrahydropteroyltri-L-glutamic acid                      | THPTGlu                  | - | Cation     | 626.2296 | 627.2369 | A-3 | UID    | UID    | UID    | UID             |
| Methionine oxidation                      | I | L-Methionine sulfoxide                                    | MetSFx                   | + | Cation     | 165.0460 | 166.0532 | A-4 | 0.0017 | 0.0032 | 0.0032 | 0.0031          |
| Methylglyoxal pathway                     | I | D-Lactic acid                                             | D-Lactic acid            | + | Anion      | 90.0317  | 89.0244  |     |        |        |        | See Lactic acid |
| Methylglyoxal pathway                     | I | S-Lactoylglutathione                                      | SL-GSH                   | + | Cation     | 379.1049 | 380.1122 | D-2 | 0.0076 | 0.0092 | 0.0075 | 0.0144          |
| Modification of lipid A                   | I | 4-Amino-4-deoxy-L-arabinose                               | Ara4N                    | - | Cation     | 149.0688 | 150.0761 |     | UID    | UID    | UID    | UID             |
| Modification of lipid A                   | I | UDP-4-(N-formylamino)-4-deoxy-L-arabinose                 | UDP-Ara4FN               | - | Nucleotide | 562.0475 | 561.0403 |     | UID    | UID    | UID    | UID             |
| Modification of lipid A                   | I | UDP-4-amino-4-deoxy-L-arabinose                           | UDP-Ara4N                | - | Nucleotide | 534.0526 | 533.0453 |     | UID    | UID    | UID    | UID             |
| Modification of lipid A                   | I | UDP-4-ketopyranose                                        | UDP-Ara4O                | - | Nucleotide | 533.0210 | 532.0137 |     | UID    | UID    | UID    | UID             |
| Molybdopterin biosynthesis                | I | Molybdopterin formA                                       | Mol-form A               | - | Anion      | 326.0290 | 325.0218 |     | UID    | UID    | UID    | UID             |
| Molybdopterin biosynthesis                | I | Molybdopterin formA-GMP                                   | Mol-form A-GMP           | - | Nucleotide | 671.0765 | 670.0692 |     | UID    | UID    | UID    | UID             |
| Molybdopterin biosynthesis                | I | Molybdopterin-guaninedinucleotide                         | MolGDN                   | - | Nucleotide | 738.0441 | 737.0368 |     | UID    | UID    | UID    | UID             |
| Molybdopterin biosynthesis                | I | Molybdopterin                                             | Molybdopterin            | - | Anion      | 395.0123 | 394.0050 |     | UID    | UID    | UID    | UID             |
| Molybdopterin biosynthesis                | I | Precursor-Z                                               | Precursor-Z              | - | Cation     | 345.0474 | 346.0547 |     | UID    | UID    | UID    | UID             |
| NAD biosynthesis                          | I | Deamido-NAD                                               | Deamido-NAD              | + | Nucleotide | 665.1004 | 663.0859 | B-4 | ND     | 0.0008 | 0.0007 | 0.0008          |
| NAD biosynthesis                          | I | Iminoaspartic acid                                        | Iminoaspartic acid       | - | Cation     | 131.0219 | 132.0291 | B-3 | UID    | UID    | UID    | UID             |
| NAD biosynthesis                          | I | Nicotinamideadeninedinucleotide (reduced form)            | NAD <sup>+</sup>         | + | Nucleotide | 664.1164 | 662.1019 | B-4 | 0.4564 | 0.6664 | 0.5548 | 0.6989          |
| NAD biosynthesis                          | I | Nicotinamideadeninedinucleotide (oxidized form)           | NADH                     | + | Nucleotide | 665.1248 | 664.1175 | B-4 | 0.0032 | 0.0038 | 0.0027 | 0.0023          |
| NAD biosynthesis                          | I | Nicotinamideadeninedinucleotidephosphate (reduced form)   | NADP <sup>+</sup>        | + | Nucleotide | 744.0827 | 742.0682 | B-4 | 0.1046 | 0.1730 | 0.1382 | 0.1543          |
| NAD biosynthesis                          | I | Nicotinamideadeninedinucleotidephosphate (oxidized form)  | NADPH                    | + | Nucleotide | 745.0911 | 743.5383 | B-4 | 0.0086 | 0.0151 | 0.0113 | 0.0092          |
| NAD biosynthesis                          | I | Nicotinatenucleotide                                      | Nicotinatenucleotide     | + | Nucleotide | 336.0484 | 334.0339 | B-4 | ND     | ND     | ND     | ND              |
| NAD biosynthesis                          | I | Quinolinic acid                                           | Quinolinic acid          | + | Anion      | 167.0219 | 166.0146 | B-3 | ND     | ND     | ND     | ND              |
| Pantothenic acid biosynthesis             | I | 2-Dehydropanoic acid                                      | ZDHPA                    | - | Anion      | 146.0579 | 145.0506 | D-3 | 0.0150 | 0.0090 | 0.0150 | 0.0072          |
| Pantothenic acid biosynthesis             | I | β-Alanine                                                 | β-Ala                    | + | Cation     | 89.0477  | 90.0550  | D-3 | ND     | ND     | ND     | ND              |
| Pantothenic acid biosynthesis             | I | L-Pantoic acid                                            | Pantoic acid             | - | Anion      | 148.0736 | 147.0663 | D-3 | UID    | UID    | UID    | UID             |
| Pantothenic acid biosynthesis             | I | Pantothenic acid                                          | Pantothenic acid         | + | Anion      | 219.1107 | 218.1034 | D-2 | 0.0207 | 0.0134 | 0.0139 | 0.0216          |
| Pentose phosphate pathway (non-oxidative) | I | D-Erythrose-4-phosphate                                   | E4P                      | + | Anion      | 200.0086 | 199.0013 | B-2 | 0.0014 | 0.0058 | 0.0057 | 0.0024          |
| Pentose phosphate pathway (non-oxidative) | I | D-Ribose-5-phosphate                                      | R5P                      | + | Anion      | 230.0192 | 229.0119 | B-2 | ND     | 0.0061 | 0.0089 | 0.0069          |
| Pentose phosphate pathway (non-oxidative) | I | D-Sedoheptulose-7-phosphate                               | S7P                      | - | Anion      | 290.0403 | 289.0330 | B-2 | 0.0100 | 0.0308 | 0.0293 | 0.0299          |
| Pentose phosphate pathway (non-oxidative) | I | D-Xylulose-5-phosphate                                    | X5P                      | + | Anion      | 230.0192 | 229.0119 | B-2 | ND     | ND     | ND     | ND              |
| Pentose phosphate pathway (oxidative)     | I | 6-Phospho-D-gluconic acid                                 | 6-PG                     | + | Anion      | 276.0246 | 275.0174 | B-2 | 0.0014 | 0.0159 | 0.0157 | 0.0122          |
| Pentose phosphate pathway (oxidative)     | I | D-Glucono-Δ-lactone-6-phosphate                           | GlcL6P                   | - | Anion      | 258.0141 | 257.0068 | B-2 | UID    | UID    | UID    | UID             |
| Pentose phosphate pathway (oxidative)     | I | D-Ribulose-5-phosphate                                    | Ru5P                     | + | Anion      | 230.0192 | 229.0119 | B-2 | 0.0214 | 0.0080 | 0.0116 | 0.0145          |
| Peptidoglycan biosynthesis                | I | D-Alanyl-D-alanine                                        | AlaAla                   | + | Cation     | 160.0848 | 161.0921 | D-2 | 0.2194 | 0.1643 | 0.1755 | 0.5799          |
| Peptidoglycan biosynthesis                | I | L-alanyl-D-glutamyl-meso-A2pm                             | AlaGluA2pm               | - | Cation     | 390.1751 | 391.1823 | D-2 | UID    | UID    | 0.0035 | 0.0065          |
| Peptidoglycan biosynthesis                | I | D-Alanine                                                 | D-Ala                    | + | Cation     | 89.0477  | 90.0550  |     |        |        |        | See Ala         |
| Peptidoglycan biosynthesis                | I | D-Glutamic acid                                           | D-Glu                    | + | Cation     | 147.0532 | 148.0604 |     |        |        |        | See Glu         |
| Peptidoglycan biosynthesis                | I | UDP-N-acetylmuramoyl-L-alanyl-D-glutamic acid             | UDP-GlcNAcMurAlaGlu      | - | Nucleotide | 879.1824 | 878.1751 |     | UID    | UID    | UID    | UID             |
| Peptidoglycan biosynthesis                | I | UDP-GlcNAc-pyruvateenolether                              | UDP-GlcNAcPyrEE          | - | Nucleotide | 677.0871 | 676.0798 |     | UID    | UID    | UID    | UID             |
| Peptidoglycan biosynthesis                | I | UDP-N-acetylmuramic acid                                  | UDP-MurNAcA              | - | Nucleotide | 679.1027 | 678.0954 | D-2 | 0.0682 | 0.0912 | 0.0630 | 0.0548          |
| Peptidoglycan biosynthesis                | I | UDP-N-acetylmuramoyl-L-alanine                            | UDP-MurNAcAla            | - | Nucleotide | 750.1398 | 749.1325 |     | UID    | UID    | UID    | UID             |
| Phenylalanine biosynthesis                | I | L-Phenylalanine                                           | Phe                      | + | Cation     | 165.0790 | 166.0863 | A-3 | 0.1028 | 0.4073 | 0.3727 | 0.7846          |
| Phenylalanine biosynthesis                | I | Phenylpyruvic acid                                        | Phenylpyruvic acid       | + | Anion      | 164.0473 | 163.0401 | A-3 | ND     | 0.0161 | 0.0098 | 0.0069          |
| Polyamine acetylation                     | I | N <sup>1</sup> -Acetylspermidine                          | N1AcSpermidine           | - | Cation     | 187.1685 | 188.1757 | A-4 | 0.0354 | 0.0276 | 0.0172 | 0.0352          |
| Polyamine acetylation                     | I | N <sup>1</sup> -Acetylspermine                            | N1AcSpermine             | + | Cation     | 244.2263 | 245.2336 | A-4 | ND     | ND     | ND     | ND              |
| Polyamine acetylation                     | I | Spermine                                                  | Spermine                 | + | Cation     | 202.2157 | 203.2230 | A-4 | ND     | ND     | ND     | ND              |
| Polyamine biosynthesis                    | I | Agmatine                                                  | Agmatine                 | + | Cation     | 130.1218 | 131.1291 | B-4 | 0.0014 | 0.0126 | 0.0125 | 0.0081          |
| Polyamine biosynthesis                    | I | S-Adenosylmethionine                                      | dAdoMet                  | + | Cation     | 355.1552 | 355.1552 | A-4 | UID    | 0.0111 | UID    | UID             |
| Polyamine biosynthesis                    | I | 5-Methylthioadenosine                                     | MTA                      | + | Cation     | 297.0896 | 298.0968 | A-4 | 0.1223 | 0.2122 | 0.2002 | 0.3119          |
| Polyamine biosynthesis                    | I | Putrescine                                                | Putrescine               | + | Cation     | 88.1000  | 89.1073  | B-4 | 1.5761 | 1.2554 | 1.2431 | 1.2192          |
| Polyamine biosynthesis                    | I | Spermidine                                                | Spermidine               | + | Cation     | 145.1579 | 146.1652 | A-4 | 0.0229 | 0.0334 | 0.0351 | 0.0482          |
| Polyamine biosynthesis                    | I | Urea                                                      | Urea                     | + | Cation     | 60.0324  | 61.0396  | B-4 | 0.6000 | 0.6969 | 0.4909 | 0.4880          |
| ppGpp biosynthesis                        | I | Guanosine-5'-diphosphate,3'-diphosphate                   | ppGpp                    | + | Nucleotide | 602.9570 | 601.9497 | B-1 | ND     | 0.0163 | 0.0047 | 0.0116          |
| ppGpp biosynthesis                        | I | Guanosine-3'-diphosphate-5'-triphosphate                  | pppGpp                   | - | Nucleotide | 682.9233 | 681.9161 | B-1 | UID    | UID    | UID    | UID             |
| Prephenic acid biosynthesis               | I | Prephenic acid                                            | Prephenic acid           | + | Anion      | 226.0477 | 225.0405 | A-3 | ND     | ND     | ND     | ND              |
| Proline biosynthesis                      | I | L-Glutamate-5-phosphate                                   | Glu-5-P                  | - | Anion      | 227.0195 | 226.0122 | C-4 | UID    | UID    | UID    | UID             |
| Proline biosynthesis                      | I | L-Glutamate-γ-semialdehyde                                | Glu-semialdehyde         | - | Cation     | 131.0582 | 132.0655 | C-4 | UID    | UID    | UID    | UID             |
| Proline biosynthesis                      | I | L-Proline                                                 | Pro                      | + | Cation     | 115.0633 | 116.0706 | B-4 | 0.0245 | 0.1245 | 0.0520 | 0.0531          |
| Proline biosynthesis                      | I | L-Δ <sup>1</sup> -pyrroline-5-carboxylic acid             | Pyrrroline-5-carboxylate | + | Anion      | 113.0477 | 112.0404 | C-4 | ND     | ND     | ND     | ND              |
| Proto- and siroheme biosynthesis          | I | 5-Aminolevulinic acid                                     | 5-Aminolevulinic acid    | + | Cation     | 131.0582 | 132.0655 | C-4 | ND     | ND     | ND     | ND              |
| Proto- and siroheme biosynthesis          | I | Coproporphyrinogen III                                    | CoPorgen III             | - | Anion      | 660.3159 | 659.3086 |     | UID    | UID    | UID    | UID             |
| Proto- and siroheme biosynthesis          | I | Glutamate-1-semialdehyde                                  | GluSA                    | - | Cation     | 131.0582 | 132.0655 | C-4 | UID    | UID    | UID    | UID             |
| Proto- and siroheme biosynthesis          | I | Hydroxymethylbilane                                       | HMB                      | - | Anion      | 854.2858 | 853.2785 |     | UID    | UID    | UID    | UID             |
| Proto- and siroheme biosynthesis          | I | Protoporphyrin IX                                         | Por IX                   | + | Anion      | 562.2580 | 561.2507 |     | ND     | ND     | ND     | ND              |
| Proto- and siroheme biosynthesis          | I | Porphobilinogen                                           | Porphobilinogen          | + | Cation     | 226.0954 | 227.1026 | C-4 | 0.0077 | 0.0084 | 0.0104 | 0.0084          |
| Proto- and siroheme biosynthesis          | I | Precorrin-1                                               | Precorrin-1              | - | Anion      | 850.2909 | 849.2836 |     | UID    | UID    | UID    | UID             |
| Proto- and siroheme biosynthesis          | I | Precorrin-2                                               | Precorrin-2              | - | Anion      | 864.3065 | 863.2993 |     | UID    | UID    | UID    | UID             |
| Proto- and siroheme biosynthesis          | I | Protoheme IX                                              | Protoheme IX             | - | Anion      | 614.1616 | 613.1544 | C-4 | 0.8815 | 0.4759 | 0.2597 | 0.8773          |
| Proto- and siroheme biosynthesis          | I | Protoporphyrinogen IX                                     | Protoporphyrinogen IX    | - | Anion      | 564.2737 | 563.2664 |     | UID    | UID    | UID    | UID             |
| Proto- and siroheme biosynthesis          | I | S-Adenosylhomocysteine                                    | SAHC                     | + | Cation     | 384.1216 | 385.1289 | C-4 | ND     | ND     | ND     | ND              |
| Proto- and siroheme biosynthesis          | I | Siroheme                                                  | Siroheme                 | - | Anion      | 916.2102 | 915.2029 | C-4 | UID    | UID    | UID    | UID             |
| Proto- and siroheme biosynthesis          | I | Sirohydrochlorin                                          | Sirohydrochlorin         | - | Anion      | 862.2909 | 861.2836 |     | UID    | UID    | UID    | UID             |
| Proto- and siroheme biosynthesis          | I | Uroporphyrinogen-III                                      | UroPorgen-III            | - | Anion      | 836.2752 | 835.2680 |     | UID    | UID    | UID    | UID             |
| Proto- and siroheme biosynthesis          | I | Uroporphyrin III                                          | Uroporphyrin III         | - | Anion      | 828.2126 | 827.2054 |     | UID    | UID    | UID    | UID             |
| PRPP biosynthesis                         | I | 5-Phosphoribosyl-diphosphate                              | PRPP                     | + | Nucleotide | 389.9518 | 388.9445 | B-2 | ND     | 0.0252 | 0.0121 | 0.0137          |
| PRPP biosynthesis                         | I | D-Ribose-1,5-diphosphate                                  | R1,5P                    | - | Nucleotide | 309.9855 | 308.9782 | B-2 | 0.0157 | 0.0295 | 0.0203 | 0.0089          |
| Purine biosynthesis                       | I | Adenosine-5'-diphosphate                                  | ADP                      | + | Nucleotide | 427.0294 | 426.0221 | A-1 | 0.2736 | 0.4401 | 0.3575 | 0.2055          |
| Purine biosynthesis                       | I | Aminoimidazole carboxamide ribonucleotide                 | AICAR                    | + | Nucleotide | 338.0628 | 337.0555 | A-1 | ND     | 0.0013 | 0.0080 | 0.0100          |
| Purine biosynthesis                       | I | 5-Aminoimidazole ribonucleotide                           | AIR                      | - | Nucleotide | 295.0569 | 294.0497 | A-2 | UID    | UID    | UID    | UID             |
| Purine biosynthesis                       | I | Adenine-5'-phosphate                                      | AMP                      | + | Nucleotide | 347.0631 | 346.0558 | A-1 | 0.0769 | 0.0643 | 0.0607 | 0.0523          |
| Purine biosynthesis                       | I | Adenylosuccinic acid                                      | ASA                      | + | Nucleotide | 449.0584 | 448.0511 | A-1 | ND     | ND     | ND     | ND              |
| Purine biosynthesis                       | I | Adenosine-5'-triphosphate                                 | ATP                      | + | Nucleotide | 506.9958 | 505.9885 | A-1 | 0.5021 | 2.2443 | 1.5756 | 0.7624          |
| Purine biosynthesis                       | I | 5'-Phosphoribosyl-4-carboxy-5-aminoimidazole              | CAIR                     | - | Nucleotide | 339.0468 | 338.0395 | A-1 | UID    | UID    | UID    | UID             |
| Purine biosynthesis                       | I | Deoxyadenosine-5'-diphosphate                             | dADP                     | + | Nucleotide | 411.0345 | 410.0272 | A-1 | 0.0313 | 0.0293 | 0.0316 | 0.0236          |
| Purine biosynthesis                       | I | Deoxyadenine-5'-triphosphate                              | dATP                     | + | Nucleotide | 491.0008 | 489.9936 | A-1 | 0.0519 | 0.1308 | 0.1210 | 0.0844          |
| Purine biosynthesis                       | I | Phosphoribosylformamidocarboxamide                        | FAICAR                   | - | Nucleotide | 366.0577 | 365.0504 | A-1 | UID    | UID    | UID    | UID             |
| Purine biosynthesis                       | I | 5-Phosphoribosyl-N-formylglycineamide                     | FGAR                     | - | Nucleotide | 313.0675 | 312.0602 | A-2 | 0.0028 | 0.0044 | 0.0017 | UID             |
| Purine biosynthesis                       | I | 5'-Phosphoribosyl-N-formylglycineamide                    | FGAR                     | - | Nucleotide | 314.0515 | 313.0442 | A-2 | UID    | 0.0019 | 0.0036 | 0.0015          |
| Purine biosynthesis                       | I | 5-Phosphoribosylglycineamide                              | GAR                      | - | Nucleotide | 286.0566 | 285.0493 | A-2 | UID    | UID    | UID    | UID             |
| Purine biosynthesis                       | I | Guanosine-5'-diphosphate                                  | GDP                      | + | Nucleotide | 443.0243 | 442.0171 | B-1 | 0.0630 | 0.0938 | 0.1106 | 0.0921          |
| Purine biosynthesis                       | I | Guanine-5'-phosphate                                      | GMP                      | + | Nucleotide | 363.0580 | 362.0507 | B-1 | 0.0055 | 0.0058 | 0.0078 | 0.0064          |
| Purine biosynthesis                       | I | Guanosine-5'-triphosphate                                 | GTP                      | + | Nucleotide | 521.9828 | 520.9756 | B-1 | 0.0682 | 0.2711 | 0.3277 | 0.2215          |
| Purine biosynthesis                       | I | Inosine-5'-phosphate                                      | IMP                      | + | Nucleotide | 348.0471 | 347.0398 | A-1 | ND     | ND     | ND     | ND              |
| Purine biosynthesis                       | I | N <sup>5</sup> -Carboxyaminoimidazole ribonucleotide      | N5-CAIR                  | - | Nucleotide | 338.0389 | 337.0317 | A-2 | UID    | UID    | UID    | UID             |
| Purine biosynthesis                       | I | 5-Phosphoribosylamine                                     | PRA                      | - | Nucleotide | 229.0351 | 228.0279 | A-2 | UID    | UID    | UID    | UID             |
| Purine biosynthesis                       | I | 5'-Phosphoribos                                           |                          |   |            |          |          |     |        |        |        |                 |

|                                      |    |                                                                   |                    |   |            |          |          |     |        |                 |        |            |                                |
|--------------------------------------|----|-------------------------------------------------------------------|--------------------|---|------------|----------|----------|-----|--------|-----------------|--------|------------|--------------------------------|
| Salvage of Ade, HypXan               | I  | Adenine                                                           | Adenine            | + | Cation     | 135.0545 | 136.0618 | A-1 | 0.0056 | 0.0073          | 0.0094 | 0.0053     |                                |
| Salvage of Ade, HypXan               | I  | Adenosine                                                         | Adenosine          | + | Cation     | 267.0968 | 268.1040 | A-1 | 0.0077 | 0.0243          | 0.0221 | 0.0046     |                                |
| Salvage of Ade, HypXan               | I  | Deoxyadenosine                                                    | dAdenosine         | + | Cation     | 251.1018 | 252.1091 | A-1 | ND     | ND              | ND     | ND         |                                |
| Salvage of Ade, HypXan               | I  | Deoxyinosine                                                      | dInosine           | + | Cation     | 252.0859 | 253.0931 | A-1 | ND     | ND              | ND     | ND         |                                |
| Salvage of Ade, HypXan               | I  | Hypoxanthine                                                      | Hypoxanthine       | + | Cation     | 136.0385 | 137.0458 | A-1 | 0.0844 | 0.0368          | 0.0387 | 0.0517     |                                |
| Salvage of Ade, HypXan               | I  | Inosine                                                           | Inosine            | + | Cation     | 268.0808 | 269.0880 | A-1 | 0.0290 | 0.0072          | 0.0129 | 0.0157     |                                |
| Salvage of Ade, HypXan               | I  | Uric acid                                                         | Uric acid          | + | Cation     | 168.0283 | 169.0356 | B-1 | ND     | ND              | ND     | ND         |                                |
| Salvage of Ade, HypXan               | I  | Xanthine                                                          | Xanthine           | + | Cation     | 152.0334 | 153.0407 | B-1 | 0.0189 | ND              | ND     | ND         |                                |
| Salvage of Gua, Xan                  | I  | Deoxyguanosine                                                    | dGuanosine         | + | Cation     | 267.0968 | 268.1040 | B-1 | 0.0077 | 0.0243          | 0.0234 | 0.0046     |                                |
| Salvage of Gua, Xan                  | I  | Deoxyribose-1-phosphate                                           | dR1P               | + | Anion      | 214.0242 | 213.0170 | D-3 | ND     | ND              | ND     | ND         |                                |
| Salvage of Gua, Xan                  | I  | Guanine                                                           | Guanine            | + | Cation     | 151.0494 | 152.0567 | B-1 | 0.0316 | 0.0037          | 0.0074 | 0.0154     |                                |
| Salvage of Gua, Xan                  | I  | Guanosine                                                         | Guanosine          | + | Cation     | 283.0917 | 284.0989 | B-1 | 0.0253 | 0.0103          | 0.0214 | 0.0127     |                                |
| Salvage of Gua, Xan                  | I  | D-Ribose-1-phosphate                                              | R1P                | - | Anion      | 230.0192 | 229.0119 | B-2 | UID    | UID             | UID    | UID        |                                |
| Salvage of Gua, Xan                  | I  | Xanthosine                                                        | Xanthosine         | + | Cation     | 284.0757 | 285.0830 | B-1 | ND     | ND              | ND     | ND         |                                |
| Salvage of pyridoxal-5'-phosphate    | I  | Pyridoxal                                                         | Pyridoxal          | + | Cation     | 167.0582 | 168.0655 |     | ND     | ND              | ND     | ND         |                                |
| Salvage of pyridoxal-6'-phosphate    | I  | Pyridoxamine                                                      | Pyridoxamine       | + | Cation     | 168.0899 | 169.0972 |     | 0.0016 | 0.0231          | 0.0221 | 0.0239     |                                |
| Salvage of pyridoxal-7'-phosphate    | I  | Pyridoxamine-5'-phosphate                                         | PX5P               | + | Anion      | 248.0562 | 247.0489 |     | 0.0174 | 0.0117          | 0.0193 | 0.0220     |                                |
| Salvage of pyridoxal-8'-phosphate    | I  | Pyridoxine                                                        | Pyridoxine         | + | Cation     | 169.0739 | 170.0812 |     | ND     | ND              | ND     | ND         |                                |
| Salvage of pyrimidine                | I  | Cytidine-5'-phosphate                                             | UMP                | + | Nucleotide | 323.0519 | 322.0446 | D-4 | 0.0254 | 0.0239          | 0.0222 | 0.0456     |                                |
| Salvage of pyrimidine                | I  | Cytidine                                                          | Cytidine           | + | Cation     | 243.0855 | 244.0928 | D-4 | ND     | ND              | ND     | ND         |                                |
| Salvage of pyrimidine                | I  | Cytosine                                                          | Cytosine           | + | Cation     | 111.0433 | 112.0505 | D-4 | 0.0090 | 0.0029          | 0.0026 | 0.0044     |                                |
| Salvage of pyrimidine                | I  | Deoxycytidine                                                     | dCyt               | + | Cation     | 227.0906 | 228.0979 | D-3 | ND     | ND              | ND     | ND         |                                |
| Salvage of pyrimidine                | I  | Deoxyuridine                                                      | dUri               | + | Cation     | 228.0746 | 229.0819 | D-3 | ND     | ND              | ND     | ND         |                                |
| Salvage of pyrimidine                | I  | Thymidine                                                         | Thymidine          | + | Cation     | 242.0903 | 243.0975 | D-3 | ND     | ND              | ND     | ND         |                                |
| Salvage of pyrimidine                | I  | Thymine                                                           | Thymine            | + | Cation     | 126.0429 | 127.0502 | D-3 | 0.0027 | ND              | ND     | ND         |                                |
| Salvage of pyrimidine                | I  | Uracil                                                            | Uracil             | + | Cation     | 112.0273 | 113.0346 | D-4 | ND     | ND              | ND     | ND         |                                |
| Salvage of pyrimidine                | I  | Uridine                                                           | Uridine            | + | Cation     | 244.0695 | 245.0768 | D-4 | ND     | ND              | ND     | ND         |                                |
| SAM biosynthesis                     | I  | S-Adenosyl-L-methionine                                           | SAM                | + | Cation     | 399.1451 | 399.1451 | A-4 | 0.0420 | 0.0693          | 0.0671 | 0.1181     | Including trinary sulfur       |
| Serine biosynthesis                  | I  | 3-Phosphohydroxypyruvic acid                                      | 3PHPA              | - | Anion      | 183.9773 | 182.9700 | C-3 | UID    | UID             | UID    | UID        |                                |
| Serine biosynthesis                  | I  | 3-Phosphoserine                                                   | 3PSer              | + | Anion      | 185.0089 | 184.0017 | C-3 | ND     | ND              | 0.0017 | ND         |                                |
| Serine biosynthesis                  | I  | L-Serine                                                          | Ser                | + | Cation     | 105.0426 | 106.0499 | C-3 | 0.1112 | 0.2028          | 0.1328 | 0.1815     |                                |
| Sulfuric acid assimilation           | I  | Adenosine-5'-phosphosulfate                                       | APS                | + | Nucleotide | 427.0199 | 426.0126 | C-2 | 0.0182 | 0.0711          | 0.0534 | 0.0255     |                                |
| Sulfuric acid assimilation           | I  | Adenosine-3',5'-diphosphate                                       | pAp                | + | Nucleotide | 427.0294 | 426.0221 | D-2 | 0.0177 | 0.0675          | 0.0526 | 0.0246     |                                |
| Sulfuric acid assimilation           | I  | 3'-Phosphoadenosine-5'-phosphosulfate                             | PAPS               | - | Nucleotide | 506.9862 | 505.9790 | C-2 | UID    | UID             | UID    | UID        |                                |
| TCA cycle                            | I  | 2-Oxoglutaric acid                                                | 2-OG               | + | Anion      | 146.0215 | 145.0142 | C-4 | ND     | 0.0911          | 0.0423 | 0.0303     |                                |
| TCA cycle                            | I  | cis-Aconitic acid                                                 | cis-Aconitic acid  | + | Anion      | 174.0164 | 173.0092 | C-3 | ND     | 0.0057          | 0.0064 | 0.0006     |                                |
| TCA cycle                            | I  | Citric acid                                                       | Citric acid        | + | Nucleotide | 192.0270 | 191.0197 | C-3 | 0.0763 | 0.6989          | 0.5342 | 0.2005     |                                |
| TCA cycle                            | I  | Fumaric acid                                                      | Fumaric acid       | + | Anion      | 116.0110 | 115.0037 | B-4 | 0.0128 | 0.0872          | 0.0481 | 0.0368     |                                |
| TCA cycle                            | I  | Isocitric acid                                                    | Isocitric acid     | + | Nucleotide | 192.0270 | 191.0197 | C-4 | ND     | ND              | ND     | ND         |                                |
| TCA cycle                            | I  | Malic acid                                                        | Malic acid         | - | Anion      | 134.0215 | 133.0142 | B-3 | 0.0197 | 0.2072          | 0.1314 | 0.1180     |                                |
| TCA cycle                            | I  | Succinic acid                                                     | Succinic acid      | + | Anion      | 118.0266 | 117.0193 | B-4 | 0.0720 | 0.6073          | 0.3211 | 0.2371     |                                |
| TCA cycle                            | I  | Succinyl-CoA                                                      | SuccCoA            | + | Nucleotide | 867.1313 | 432.5584 | C-4 | 0.0009 | 0.0076          | 0.0021 | 0.0021     | Detected as divalent ion in MS |
| Tetrahydrofolic acid biosynthesis    | I  | 4-Amino-4-deoxychorismic acid                                     | ADCA               | - | Cation     | 225.0637 | 226.0710 | C-1 | UID    | UID             | UID    | UID        |                                |
| Tetrahydrofolic acid biosynthesis    | I  | 2-Amino-4-hydroxy-6-hydroxymethyl-7,8-dihydropteridinediphosphate | AHMeDHPPD          | - | Nucleotide | 355.0083 | 354.0010 | C-1 | 0.0011 | 0.0012          | 0.0007 | UID        |                                |
| Tetrahydrofolic acid biosynthesis    | I  | 7,8-Dihydrofolic acid                                             | DHFA               | + | Cation     | 443.1553 | 444.1626 | D-1 | ND     | ND              | ND     | ND         |                                |
| Tetrahydrofolic acid biosynthesis    | I  | Dihydroneopterin-3'-triphosphate                                  | DHMTP              | - | Nucleotide | 494.9958 | 493.9885 | B-1 | UID    | UID             | UID    | UID        |                                |
| Tetrahydrofolic acid biosynthesis    | I  | 7,8-Dihydroneopterin                                              | DHN                | + | Cation     | 255.0968 | 256.1040 | C-1 | ND     | ND              | ND     | ND         |                                |
| Tetrahydrofolic acid biosynthesis    | I  | Dihydroneopterinphosphate                                         | DHNMP              | - | Nucleotide | 335.0631 | 334.0558 | C-1 | UID    | UID             | UID    | UID        |                                |
| Tetrahydrofolic acid biosynthesis    | I  | 7,8-Dihydroneopterin-3'-triphosphate                              | DHNTP              | - | Nucleotide | 494.9958 | 493.9885 | B-1 | UID    | UID             | UID    | UID        |                                |
| Tetrahydrofolic acid biosynthesis    | I  | 7,8-Dihydroptericoic acid                                         | DHPA               | - | Cation     | 314.1127 | 315.1200 | C-1 | UID    | UID             | UID    | UID        |                                |
| Tetrahydrofolic acid biosynthesis    | I  | 6-Hydroxymethyldehydropterin                                      | HMeDHP             | - | Cation     | 195.0756 | 196.0829 | C-1 | UID    | UID             | UID    | UID        |                                |
| Tetrahydrofolic acid biosynthesis    | I  | N <sup>10</sup> -Formyl-THF                                       | N10-THF            | - | Cation     | 473.1659 | 474.1732 | D-1 | UID    | UID             | UID    | UID        |                                |
| Tetrahydrofolic acid biosynthesis    | I  | p-Aminobenzoic acid                                               | PABA               | + | Cation     | 137.0477 | 138.0550 | C-1 | ND     | ND              | ND     | ND         |                                |
| Thiamine biosynthesis                | I  | 4-Amino-5-hydroxymethyl-2-methylpyrimidinepyrophosphate           | 4A5HMe2MePyrPP     | - | Nucleotide | 299.0072 | 298.0000 | D-1 | 0.0014 | 0.0021          | 0.0021 | 0.0019     |                                |
| Thiamine biosynthesis                | I  | 4-Methyl-5-(β-hydroxyethyl)thiazole                               | 4Me5BHEthThiazole  | + | Cation     | 143.0405 | 144.0478 |     | ND     | ND              | ND     | ND         |                                |
| Thiamine biosynthesis                | I  | 4-Methyl-5-(β-hydroxyethyl)thiazolephosphate                      | 4Me5BHEthThiazoleP | - | Anion      | 223.0068 | 221.9995 |     | UID    | UID             | UID    | UID        |                                |
| Thiamine biosynthesis                | I  | Hydroxymethylpyrimidine                                           | HMePyr             | - | Cation     | 139.0746 | 140.0818 |     | UID    | UID             | UID    | UID        |                                |
| Thiamine biosynthesis                | I  | Hydroxymethylpyrimidinephosphate                                  | HMePyrP            | - | Anion      | 219.0409 | 218.0336 |     | UID    | UID             | UID    | UID        |                                |
| Thiamine biosynthesis                | I  | Thiamine                                                          | Thiamine           | + | Cation     | 265.1123 | 265.1123 | D-1 | 0.2570 | 0.2594          | 0.2030 | 0.2280     | Including quarternary amine    |
| Thiamine biosynthesis                | I  | Thiaminediphosphate                                               | ThiamineDP         | + | Nucleotide | 425.0450 | 423.0304 | D-1 | 0.3180 | 0.4812          | 0.4164 | 0.4198     | Including quarternary amine    |
| Thiamine biosynthesis                | I  | Thiaminephosphate                                                 | ThiamineP          | + | Cation     | 345.0786 | 345.0786 | D-1 | 0.3903 | 0.6529          | 0.5103 | 0.5588     | Including quarternary amine    |
| Threonine biosynthesis               | I  | O-Phospho-L-homoserine                                            | P-HomoSer          | - | Anion      | 199.0246 | 198.0173 | A-3 | 0.0061 | 0.0138          | 0.0091 | UID        |                                |
| Threonine biosynthesis               | I  | L-Threonine                                                       | Thr                | + | Cation     | 119.0582 | 120.0655 | A-4 | 2.4406 | 0.2364          | 0.2374 | 0.3449     |                                |
| Trehalose biosynthesis               | I  | Trehalose-6-phosphate                                             | Tre6P              | + | Anion      | 422.0825 | 421.0753 | C-1 | ND     | ND              | ND     | ND         |                                |
| Tryptophan biosynthesis              | I  | Anthraniic acid                                                   | Anthraniic acid    | + | Cation     | 137.0477 | 138.0550 | A-2 | ND     | ND              | ND     | ND         |                                |
| Tryptophan biosynthesis              | I  | 1-(o-Carboxyphenylamino)-1'-deoxyribulose-5'-phosphate            | CPADRP             | - | Nucleotide | 349.0563 | 348.0490 | A-2 | UID    | UID             | UID    | UID        |                                |
| Tryptophan biosynthesis              | I  | Indole-3-glycerolphosphate                                        | IG-P               | - | Nucleotide | 287.0559 | 286.0486 | A-2 | UID    | UID             | UID    | UID        |                                |
| Tryptophan biosynthesis              | I  | Indole                                                            | Indole             | + | Cation     | 117.0578 | 118.0651 | A-2 | ND     | ND              | ND     | ND         |                                |
| Tryptophan biosynthesis              | I  | N-(5'-Phosphoribosyl)anthranilic acid                             | PRAnth             | - | Nucleotide | 349.0563 | 348.0490 | A-2 | UID    | UID             | UID    | UID        |                                |
| Tryptophan biosynthesis              | I  | L-Tryptophan                                                      | Trp                | + | Cation     | 204.0899 | 205.0972 | A-2 | 0.0338 | 0.0519          | 0.0521 | 0.0761     |                                |
| Tyrosine biosynthesis                | I  | p-Hydroxyphenylpyruvic acid                                       | HPP                | + | Anion      | 180.0423 | 179.0350 | A-3 | ND     | 0.0167          | ND     | 0.0085     |                                |
| Tyrosine biosynthesis                | I  | L-Tyrosine                                                        | Tyr                | + | Cation     | 181.0739 | 182.0812 | A-3 | 0.2976 | 0.6528          | 0.6505 | 1.2055     |                                |
| Ubiquinone biosynthesis              | I  | p-Hydroxybenzoic acid                                             | PHBA               | + | Anion      | 138.0317 | 137.0244 | A-3 | 0.0072 | 0.0102          | 0.0130 | 0.0184     |                                |
| UDP-N-acetylglucosamine biosynthesis | I  | D-Glucosamine-1-phosphate                                         | Glc-1P             | - | Anion      | 259.0457 | 258.0384 | C-2 |        |                 |        | See Glc-6P |                                |
| UDP-N-acetylglucosamine biosynthesis | I  | D-Glucosamine-6-phosphate                                         | Glc-6P             | + | Anion      | 259.0457 | 258.0384 | C-2 | 0.0321 | 0.0263          | 0.0359 | 0.0326     |                                |
| UDP-N-acetylglucosamine biosynthesis | I  | N-Acetylglucosamine-1-phosphate                                   | GlcNac-P           | + | Anion      | 301.0563 | 300.0490 | C-2 | 0.0011 | ND              | ND     | ND         |                                |
| UDP-N-acetylglucosamine biosynthesis | I  | UDP-N-acetyl-D-glucosamine                                        | UDP-GlcNac         | + | Nucleotide | 607.0816 | 606.0743 | C-2 | 0.1931 | 0.3081          | 0.2426 | 0.1477     |                                |
| Valine biosynthesis                  | I  | 2,3-Dihydroxyisovaleric acid                                      | 2,3-DIV            | - | Anion      | 134.0579 | 133.0506 | C-3 | 0.0233 | 0.0562          | 0.0536 | 0.0139     |                                |
| Valine biosynthesis                  | I  | 2-Acetoacetic acid                                                | 2-Ac               | - | Anion      | 132.0423 | 131.0350 | C-3 | UID    | 0.0255          | 0.0050 | 0.0111     |                                |
| Valine biosynthesis                  | I  | 2-Ketoisovaleric acid                                             | 2-KIV              | + | Anion      | 116.0473 | 115.0401 | C-3 | ND     | 0.0245          | ND     | 0.0011     |                                |
| Valine biosynthesis                  | I  | L-Valine                                                          | Val                | + | Cation     | 117.0790 | 118.0863 | C-3 | 0.1214 | 0.4426          | 0.3240 | 0.5089     |                                |
| Acetylglucosamine dissimilation      | II | N-Acetyl-D-mannosamine-6-phosphate                                | ManNac6P           | - | Anion      | 301.0563 | 300.0490 |     | UID    | UID             | UID    | UID        |                                |
| Acetylglucosamine dissimilation      | II | N-Acetylneuraminic acid                                           | NeuNac             | + | Anion      | 309.1060 | 308.0987 | D-2 | 0.0035 | 0.0198          | 0.0165 | 0.0290     |                                |
| Arginine degradation                 | II | N <sup>2</sup> -Succinyl-L-arginine                               | N2SucArg           | - | Cation     | 274.1277 | 275.1350 | B-4 | 0.0014 | 0.0011          | 0.0015 | 0.0222     |                                |
| Arginine degradation                 | II | N <sup>2</sup> -Succinylglutamic acid                             | N2SucGlu           | - | Cation     | 247.0692 | 248.0765 | B-4 | UID    | 0.0030          | 0.0019 | 0.0026     |                                |
| Arginine degradation                 | II | N <sup>2</sup> -Succinylglutamate-5-semialdehyde                  | N2SucGluSA         | - | Cation     | 233.0899 | 234.0972 | B-4 | UID    | UID             | UID    | UID        |                                |
| Arginine degradation                 | II | N <sup>2</sup> -Succinylornithine                                 | N2SucOrn           | - | Cation     | 232.1059 | 233.1132 | B-4 | 0.0373 | 0.0236          | 0.0161 | 0.0116     |                                |
| Glucosamine degradation              | II | N-Acetyl-D-glucosamine-6-phosphate                                | NacGlcNP           | + | Anion      | 301.0563 | 300.0490 |     | ND     | ND              | ND     | ND         |                                |
| Histidine degradation                | II | Imidazole lactic acid                                             | Im-lactate         | - | Cation     | 156.0535 | 157.0608 | B-1 | 0.0044 | 0.0008          | UID    | UID        |                                |
| Histidine degradation                | II | Imidazolepyruvic acid                                             | Im-pyruvic acid    | - | Cation     | 154.0378 | 155.0451 | B-1 | UID    | UID             | UID    | UID        |                                |
| Lysine degradation                   | II | Cadaverine                                                        | Cadaverine         | + | Cation     | 102.1157 | 103.1230 |     | 0.0026 | 0.0053          | 0.0081 | 0.0072     |                                |
| Methylmalonyl pathway                | II | D-Methylmalonyl-CoA                                               | D-MeMal-CoA        | + | Nucleotide | 867.1313 | 432.5584 | A-4 | ND     | 0.0055          | 0.0009 | 0.0012     | Detected as divalent ion in MS |
| Methylmalonyl pathway                | II | L-Methylmalonyl-CoA                                               | L-MeMal-CoA        | - | Nucleotide | 867.1313 | 432.5584 | A-4 |        | See D-MeMal-CoA |        |            | Detected as divalent ion in MS |
| Peptidoglycan turnover               | II | Anhydro-N-acetylmuramic acid                                      | AHMurNac           | - | Cation     | 275.1005 | 276.1078 |     | UID    | UID             | UID    | UID        |                                |
| Peptidoglycan turnover               | II | L-Alanyl-γ-D-glutamyl-meso-diaminopimelyl-D-alanine               | AlaGluDAPAla       | - | Cation     | 433.1809 | 434.1882 |     | UID    | UID             | UID    | UID        |                                |
| Peptidoglycan turnover               | II | L-Alanyl-γ-D-glutamyl-diaminopimelic acid                         | L-Ala-D-Glu-Dap    | - | Cation     | 309.1437 | 310.1510 |     | UID    | UID             | UID    | UID        |                                |
| Putrescine degradation               | II | 4-Aminobutyraldehyde                                              | 4ABA               | - | Cation     | 87.0684  | 88.0757  |     | UID    | UID             | UID    | UID        |                                |
| Ribosephosphate degradation          | II | Deoxyribose-5-phosphate                                           | dR5P               | + | Anion      | 214.0242 | 213.0170 |     | ND     | ND              | ND     | ND         |                                |
| S-Adenosylhomocysteine catabolism    | II | S-D-Ribose-L-homocysteine                                         | RibHomoCys         | - | Cation     | 267.0777 | 268.0849 | C-4 | 0.0300 | 0.0241          | 0.0172 | 0.0096     |                                |
| Short fatty acid degradation         | II | Acetoacetyl-CoA                                                   | Acetoacetyl-CoA    | + | Nucleotide | 851.1363 | 850.1291 |     | ND     | ND              |        |            |                                |

**Supplementary Fig. 1. Metabolome profile of *E. coli* after histidine downshift.**
